# Supplementary material for: A Versatile Viral System for Expression and Depletion of Proteins in Mammalian Cells
Source: PLOS journal article supplement (doi:10.1371/journal.pone.0006529), 2009-08-05

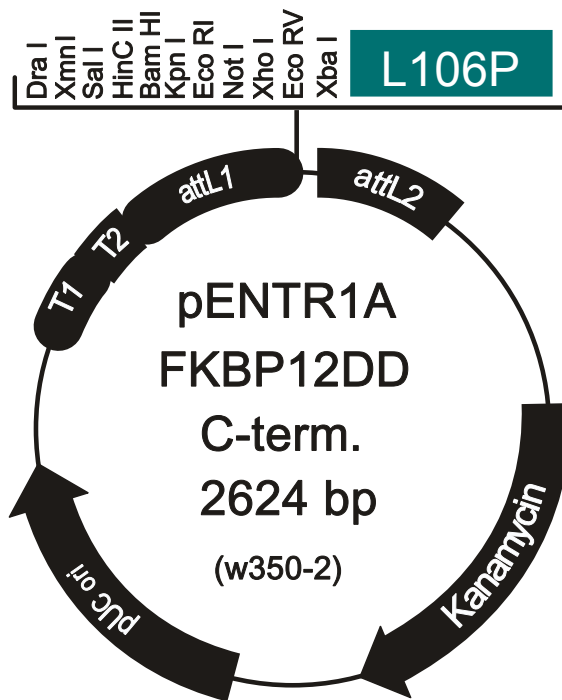

Comments for pENTR 1A FKBP12DD C-term 2624 nucleotides

rrrB T1 transcription termination sequence: bases 106-149

rrrB T2 transcription termination sequence: bases 281-308

attL1:bases 358-457 (complementary strand)

Multiple cloning site (MCS): bases 457-523

FKBP12DD (L106P) domain: 524-847

attL2:bases 853-953

Kanamycin resistance gene: bases 1075-1884

pUC origin: bases 1949-2621

|              |               |              |                |               |              |               |              |     |     |     |     |                      |                      |     |     |     |
|--------------|---------------|--------------|----------------|---------------|--------------|---------------|--------------|-----|-----|-----|-----|----------------------|----------------------|-----|-----|-----|
| <i>Dra I</i> | <i>Xmn I</i>  | <i>Sal I</i> | <i>Hinc II</i> | <i>Bam HI</i> | <i>Kpn I</i> | <i>Eco RI</i> | <i>Not I</i> |     |     |     |     |                      |                      |     |     |     |
| TTA          | AAG           | GAA          | CCA            | ATT           | CAG          | TCG           | ACT          | GGA | TCC | GGT | ACC | GAA                  | TTC                  | GCG | GCC | GCA |
| AAT          | TTC           | CTT          | GGT            | TAA           | CTC          | AGC           | TGA          | CCT | AGG | CCA | TCG | CTT                  | AAG                  | CGC | CGG | CGT |
| <i>Xho I</i> | <i>Eco RV</i> | <i>Xba I</i> |                |               |              |               |              |     |     |     |     |                      |                      |     |     |     |
| CTC          | GAG           | ATA          | TCT            | AGA           | L106P        |               |              |     |     |     |     | ACCCAGCTTTCTTGTACAAA |                      |     |     |     |
| GAG          | CTC           | TAT          | AGA            | TCT           |              |               |              |     |     |     |     | Term                 | TGGGTCGAAAGAACATGTTT |     |     |     |

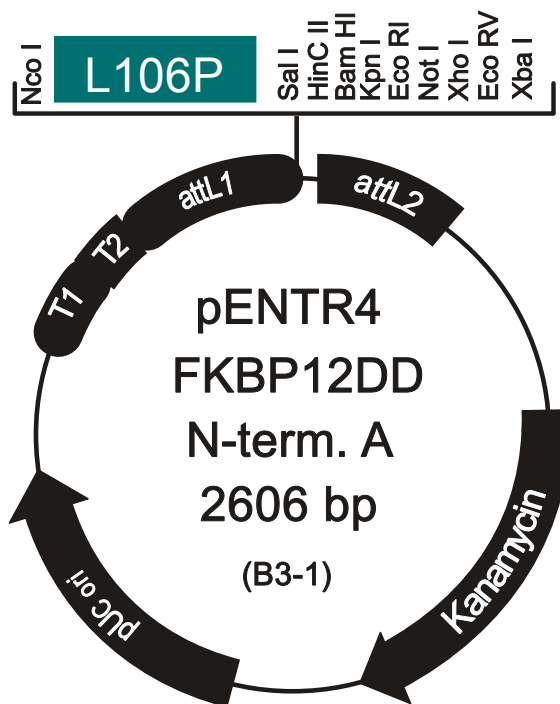

Comments for pENTR4 FKBP12DD N-term A 2606 nucleotides

rrrB T1 transcription termination sequence: bases 106-149

rrrB T2 transcription termination sequence: bases 281-308

attL1:bases 358-457 (complementary strand)

FKBP12DD (L106P) domain: 463-786

Multiple cloning site (MCS): bases 787-834

attL2:bases 835-935

Kanamycin resistance gene: bases 1057-1866

pUC origin: bases 1932-2603

|              |     |   |  |              |                |               |     |              |              |             |             |          |
|--------------|-----|---|--|--------------|----------------|---------------|-----|--------------|--------------|-------------|-------------|----------|
| <i>Nco I</i> |     |   |  | <i>Sal I</i> | <i>Hinc II</i> | <i>Bam HI</i> |     | <i>Kpn I</i> | <i>EcoRI</i> | <i>NotI</i> |             |          |
| ACC          | ATG | G |  | GTC          | GAC            | TGG           | ATC | CGG          | TAC          | CGA         | ATT         | CGC      |
| TGG          | TAC | C |  | CAG          | CTG            | ACC           | TAG | GCC          | ATG          | GCT         | TAA         | GCG      |
| <b>L106P</b> |     |   |  |              |                |               |     |              |              |             |             |          |
|              |     |   |  | <i>XhoI</i>  | <i>Eco RV</i>  | <i>Xba I</i>  |     |              |              |             |             |          |
|              |     |   |  | GGC          | CGC            | ACT           | CGA | GAT          | ATC          | TAG         | ACCAGCTTTCT | TGTACAAA |
|              |     |   |  | CCG          | GCG            | TGA           | GCT | CTA          | TAG          | ATC         | TGGTCGAAAGA | ACATGTTT |

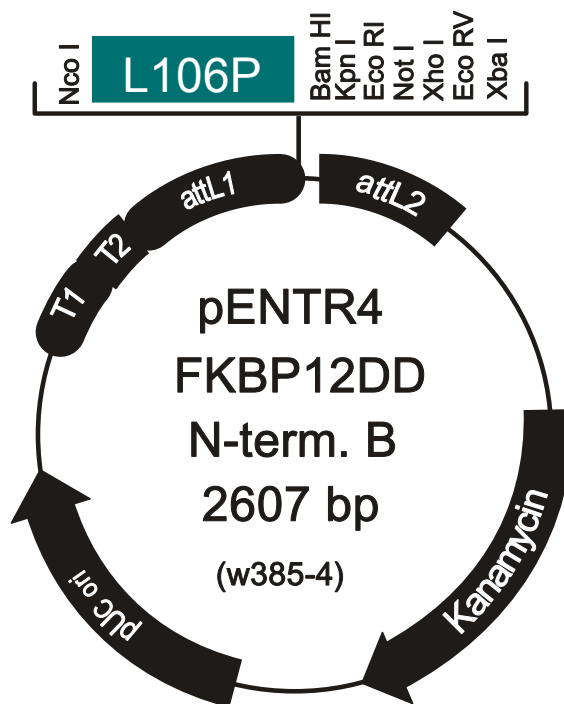

Comments for pENTR4 FKBP12DD N-term B 2607 nucleotides

rrrB T1 transcription termination sequence: bases 106-149

rrrB T2 transcription termination sequence: bases 281-308

attL1:bases 358-457 (complementary strand)

FKBP12DD (L106P) domain: 463-786

Multiple cloning site (MCS): bases 787-835

attL2:bases 836-936

Kanamycin resistance gene: bases 1058-1867

pUC origin: bases 1933-2604

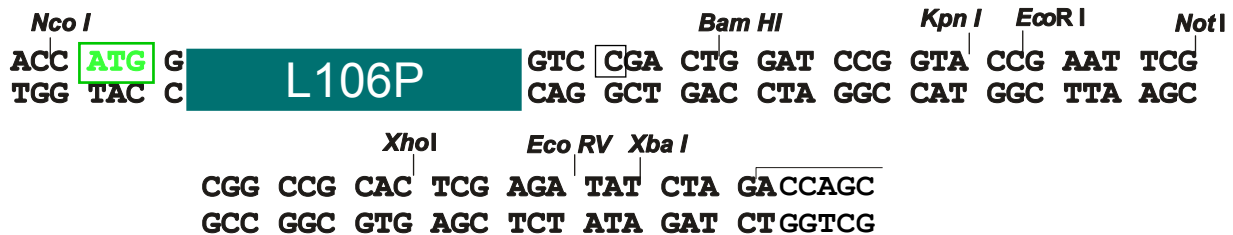

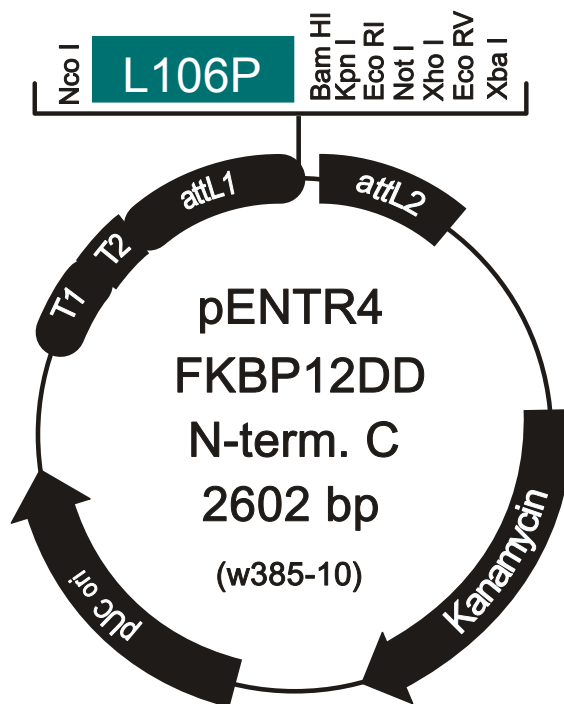

Comments for pENTR4 FKBP12DD N-term C 2602 nucleotides

rrrB T1 transcription termination sequence: bases 106-149

rrrB T2 transcription termination sequence: bases 281-308

attL1:bases 358-457 (complementary strand)

FKBP12DD (L106P) domain: 463-786

Multiple cloning site (MCS): bases 786-830

attL2:bases 831-931

Kanamycin resistance gene: bases 1053-1862

pUC origin: bases 1928-2599

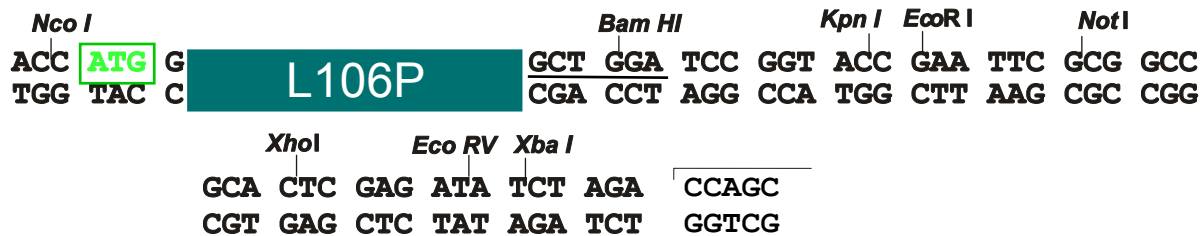

Supplement: S5 (10.1371/journal.pone.0006529.s005) [file journal.pone.0006529.s005]
