# Supplementary material for: A Versatile Viral System for Expression and Depletion of Proteins in Mammalian Cells
Source: PLOS journal article supplement (doi:10.1371/journal.pone.0006529), 2009-08-05
Supplement: S5 (10.1371/journal.pone.0006529.s005) [file journal.pone.0006529.s005]

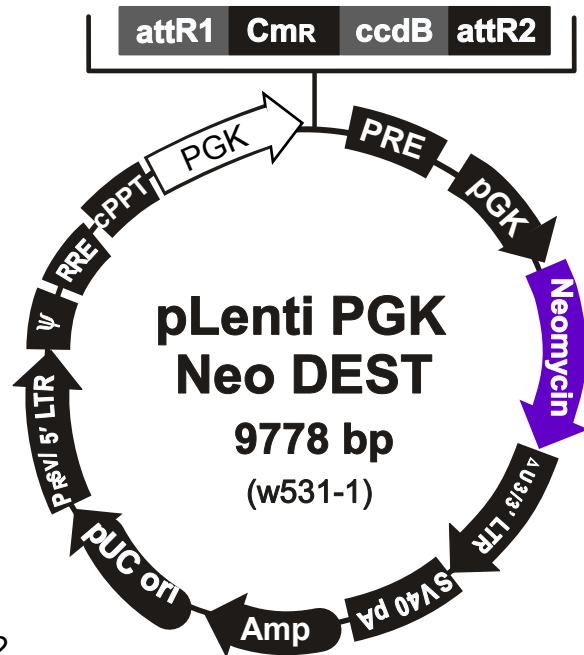

**Comments for pLenti PGK Neo DEST**  
9778 nucleotides

bla promoter: bases 32-131  
 ampicillin resistance gene: bases 132-992  
 pUC origin: bases 1138-1810  
 RSV/5LTR hybrid promoter: bases 2218-2628  
 HIV-1 psi ( $\psi$ ) packaging signal: bases 2736-2781  
 HIV-1 Rev response element (RRE): bases 3272-3525  
 3' splice acceptor: base 3862  
 3' splice acceptor: base 3901  
 Central polypurine tract (cPPT): bases 4011-4073  
 Human phosphoglycerate kinase (PGK) promoter: bases 4179-4694  
 attR1 site: bases 4745-4870  
 Chloramphenicol resistance gene (Cm): bases 4979-5638  
 ccdB gene: bases 5980-6285  
 attR2 site: bases 6325-6451  
 Woodchuck post-transcriptional element (PRE): bases 6480-7072  
 Murine phosphoglycerate kinase (pGK) promoter: bases 7108-7611  
 Neomycin resistance gene: bases 7625-8428  
 ΔU3/3' LTR: bases 8518-8756  
 SV40 polyadenylation signal: bases 8824-8958

Recommended *E.coli* strain for propagation: DB3.1 or ccDB survival'

**NOTE: This is not an Invitrogen plasmid. The position of the genetic elements is approximative.**

Eric Campeau July 2008
