# Supplementary material for: A Versatile Viral System for Expression and Depletion of Proteins in Mammalian Cells
Source: PLOS journal article supplement (doi:10.1371/journal.pone.0006529), 2009-08-05
Supplement: S5 (10.1371/journal.pone.0006529.s005) [file journal.pone.0006529.s005]

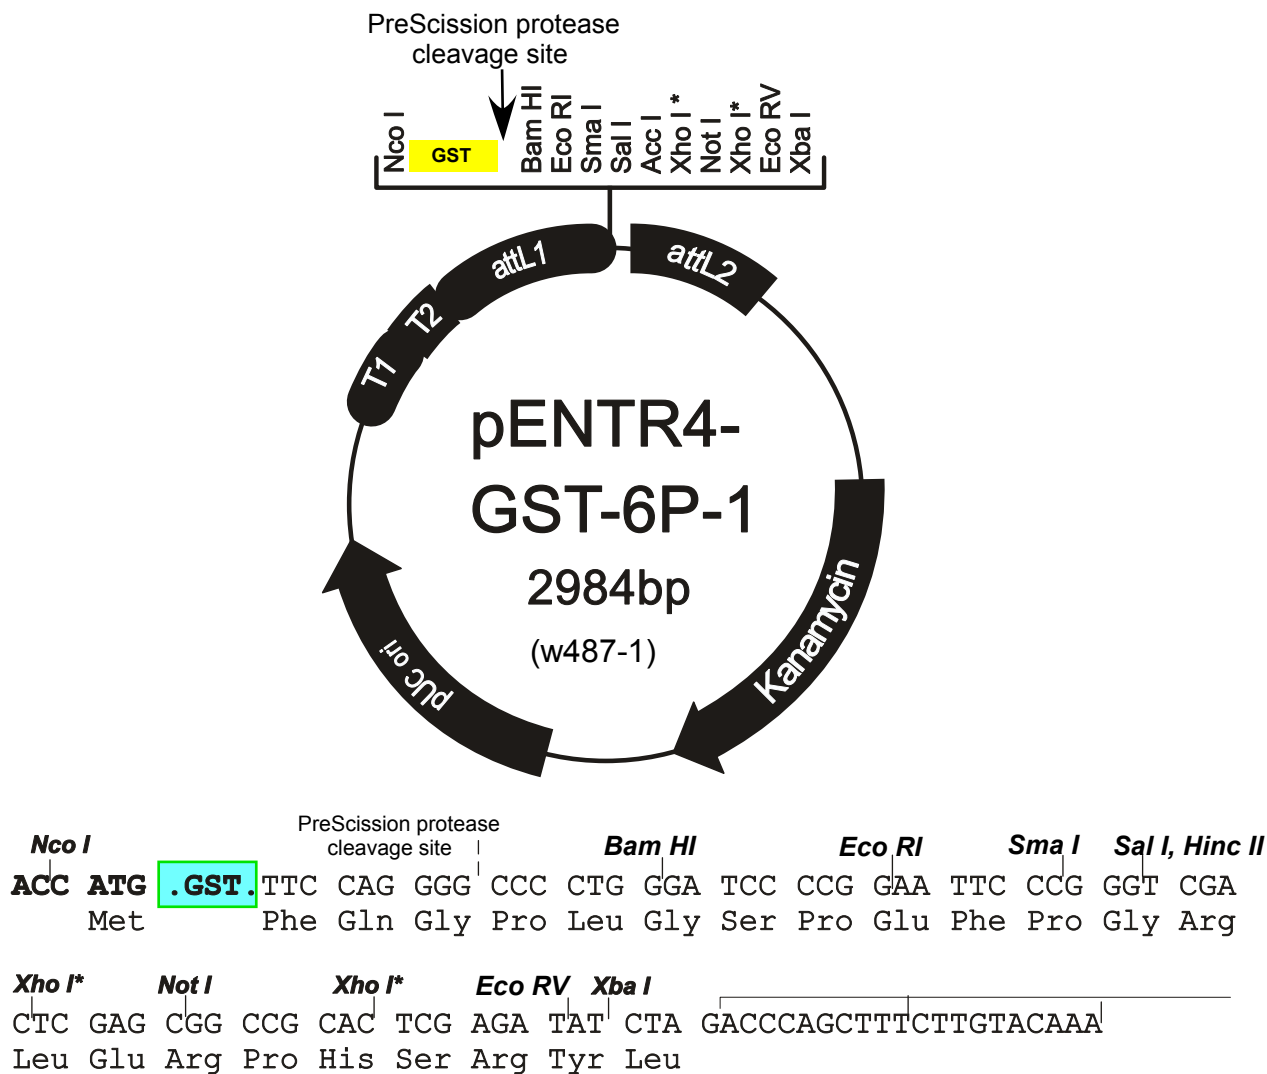

#### Comments for pENTR4-GST-6P-1

2984 nucleotides

rrrB T1 transcription termination sequence: bases 106-149

rrrB T2 transcription termination sequence: bases 281-308

attL1:bases 358-457 (complementary strand)

glutathione S-transferase (GST): bases 463-1149

PreScission protease cleavage site: between bases 1155 and 1156

Multiple cloning site (MCS) bases 1163-1214

att L2: bases 1214-1314

Kanamycin resistance gene: bases 1436-2245

pUC origin: bases 2311-2983
