# Supplementary material for: A Versatile Viral System for Expression and Depletion of Proteins in Mammalian Cells
Source: PLOS journal article supplement (doi:10.1371/journal.pone.0006529), 2009-08-05
Supplement: S5 (10.1371/journal.pone.0006529.s005) [file journal.pone.0006529.s005]

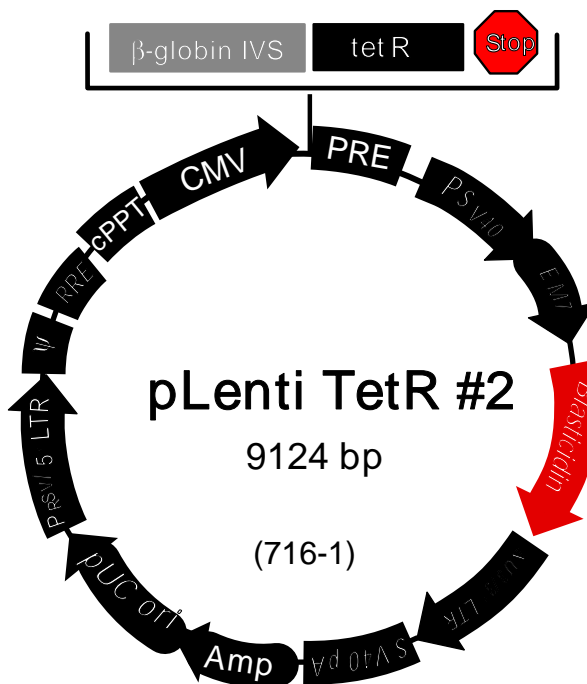

#### Comments for pLenti TetR #2

9124 nucleotides

bla promoter: bases 32-131

ampicillin resistance gene: bases 132-982

pUC origin: bases 1138-1810

RSV/5'LTR hybrid promoter: bases 2218-2628

HIV-1 psi ( $\psi$ ) packaging signal: bases 2736-2781

HIV-1 Rev response element (RRE): bases 3272-3525

3 splice acceptor: base 3862

3 splice acceptor: base 3901

Central polypurine tract (cPPT): bases 4011-4073

CMV promoter: bases 4145-4730

Rabbit  $\beta$ -globin intron II (IVS): bases

tet R gene: bases

Woodchuck post-transcriptional element (PRE): bases

SV40 early promoter and origin: bases

EM7 promoter: bases

Blasticidin resistance gene: bases

$\Delta$ U3/3'LTR: bases

SV40 polyadenylation signal: bases

Recommended E.coli strain for propagation: Stbl3

NOTE: This is not an Invitrogen plasmid. The position of the genetic elements is approximative.

Eric Campeau February 2005
