# Supplementary material for: A Versatile Viral System for Expression and Depletion of Proteins in Mammalian Cells
Source: PLOS journal article supplement (doi:10.1371/journal.pone.0006529), 2009-08-05
Supplement: S5 (10.1371/journal.pone.0006529.s005) [file journal.pone.0006529.s005]

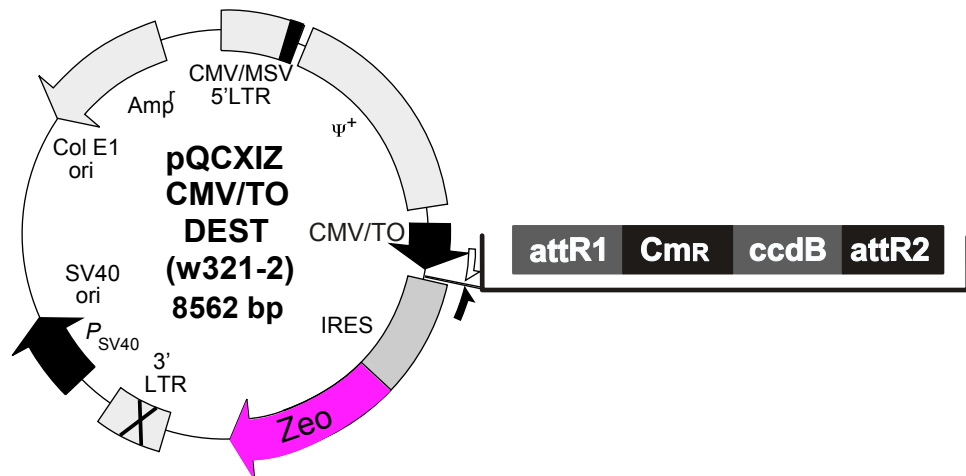

Comments on pQCXIZ CMV/TO DEST, 8562 nucleotides:

5' LTR (CMV/MSV): 1–728

Cytomegalovirus (CMV)/ mouse sarcoma virus (MSV) hybrid promoter: 1–511

R region: 584–654

U5 region: 655–728

ψ+ (extended packaging signal): 758–1567

CMV/TO promoter: 1601–2170

attR1:2198-2322

Chloramphenicol resistance gene:2431-3090

ccdB gene:3432-3737

attR2:3778-3900

Internal ribosome entry site (IRES): 4043-4617

Zeocin resistance gene (Zeo): 4674-5048

3' MoMuLV LTR (deletion in U3): 5268-5693

SV40 promoter: 5972-6239

SV40 ori: 6194-6260

Col E1 ori (Site of replication initiation): 6580

Ampicillin resistance gene (reverse orientation): 8200-7340

Use *E.coli* DB3.1 or ccDB survival strain for propagation.

NOTE: Use of this plasmid in a T-Rex cell line will prevent expression of the Blasticidin selection gene.
