# Supplementary material for: A Versatile Viral System for Expression and Depletion of Proteins in Mammalian Cells
Source: PLOS journal article supplement (doi:10.1371/journal.pone.0006529), 2009-08-05
Supplement: S5 (10.1371/journal.pone.0006529.s005) [file journal.pone.0006529.s005]

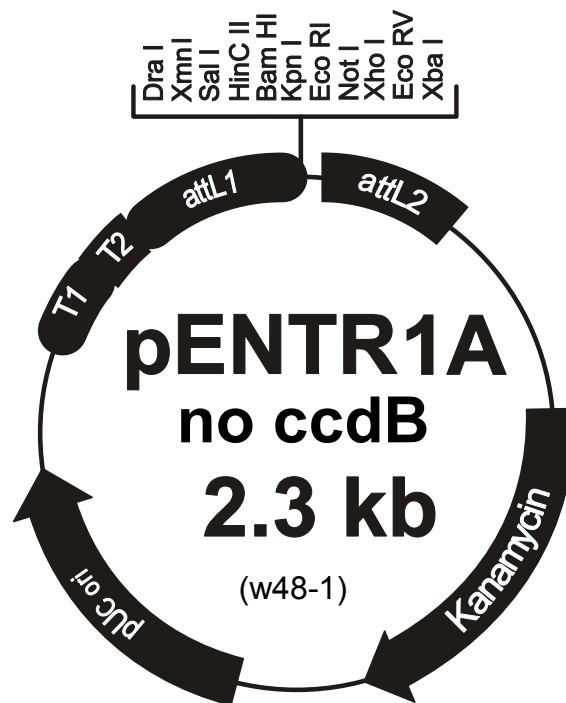

**Comments for pENTR 1A no ccdB**  
**2294 nucleotides**

rrnB T1 transcription termination sequence: bases 106-149

rrnB T2 transcription termination sequence: bases 281-308

attL1:bases 358-457 (complementary strand)

multiple cloning site (MCS): bases 457-522

attL2: bases

Kanamycin resistance gene: bases

pUC origin: bases

Recommended *E.coli* strain for propagation: TOP10F'

## pENTR 1A no ccDB MCS

352 GGGCCCCAAA TAATGATTTT ATTTTGACTG ATAGTGACCT GTTCGTTGCA ACAAATTGAT  
CCCGGGGTTT ATTACTAAAA TAAACTGAC TATCACTGGA CAAGCAACGT TGTTTAACTA

412 AAG CAA TGC TTT TTT ATA ATG CCA ACT TTGTAC AAA AAA GCA GGC TTT  
TTC GTT ACG AAA AAA TAT TAC GGT TGA AACATG TTT TTT CGT CCG AAA

460 AAA GGAACC AAT TCA GTC GAC TGG ATC CGG TAC CGA ATT C  
TTT CCT TGG TTA AGT CAG CTG ACC TAG GCC ATG GCT TAA G

GC GGC CGC CGC ACT CGA GAT ATC TAG ACC CAG CTT TCT TGT ACA AA  
CG CCG GCG GCG TGA GCT CTA TAG ATC TGG GTC GAA AGA ACA TGT TT

GTTGGCATT TAAGAAAGCA TTGCTTATCA ATTTGTTGCA ACGAACAGGT CACTATCAGT  
CAACCGTAAT ATTCTTTCGT AACGAATAGT TAAACAACGT TGCTTGTCCA GTGATAGTCA

CAAAATAAAA TCATTATTTG CCATCCAGCT GCAGCTCTGG CCCGTGTCTC AAAATCTCTG  
GTTTTATTTT AGTAATAAAC GGTAGGTCGA CGTCGAGACC GGGCACAGAG TTTTAGAGAC

ATGTTACATT  
TACAATGTAA
