# Supplementary material for: A Versatile Viral System for Expression and Depletion of Proteins in Mammalian Cells
Source: PLOS journal article supplement (doi:10.1371/journal.pone.0006529), 2009-08-05
Supplement: S5 (10.1371/journal.pone.0006529.s005) [file journal.pone.0006529.s005]

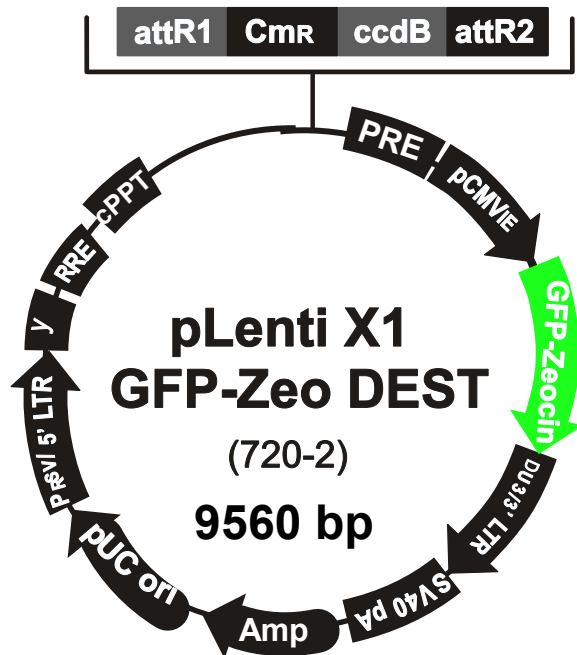

**Comments for pLenti x1 GFP-Zeo DEST**  
9560 nucleotides

bla promoter: bases 32-131  
 ampicillin resistance gene: bases 132-982  
 pUC origin: bases 1138-1808  
 RSV/5LTR hybrid promoter: bases 2212-2632  
 5' splice donor: base  
 HIV-1 psi (γ) packaging signal: bases 2736-2782  
 HIV-1 Rev response element (RRE): bases 3272-3526  
 Central polypurine tract (cPPT): bases 4010-4074  
 attR1 site: bases 4159-4284  
 Chloramphenicol resistance gene (Cm): bases 4394-5053  
 ccdB gene: bases 5395-5700  
 attR2 site: bases 5740-5866  
 Woodchuck post-transcriptional element (PRE): bases 5896-6488  
 Cytomegalovirus immediate early promoter (CMVie): bases 6491-7090  
 GFP-Zeocin resistance gene: bases 7111-8208  
 ΔU3/3'LTR: bases 8298-8543  
 SV40 polyadenylation signal: bases 8604-8779

Use DB3.1 or ccDB survival for propagation under ampicillin and chloramphenicol selection.

**NOTE: The position of the genetic elements is approximative.**
