# Supplementary material for: A Versatile Viral System for Expression and Depletion of Proteins in Mammalian Cells
Source: PLOS journal article supplement (doi:10.1371/journal.pone.0006529), 2009-08-05
Supplement: S5 (10.1371/journal.pone.0006529.s005) [file journal.pone.0006529.s005]

**Comments for pLenti GFP DEST**

**9205 nucleotides**

bla promoter: bases 32-131

ampicillin resistance gene: bases 132-992

pUC origin: bases 1138-1810

RSV/5LTR hybrid promoter: bases 2218-2628

HIV-1 psi ( $\Psi$ ) packaging signal: bases 2736-2781

HIV-1 Rev response element (RRE): bases 3272-3525

3' splice acceptor: base 3862

3' splice acceptor: base 3901

Central polypurine tract (cPPT): bases 4011-4073

CMV promoter: bases 4145-4718

Green Fluorescent Protein (GFP): bases 4755-5474

Woodchuck post-transcriptional element (PRE): bases 5493-6082

*attR1* site: bases 6134-6259

Chloramphenicol resistance gene (Cm): bases 6368-7027

*ccdB* gene: bases 7368-7674

*attR2* site: bases 7713-7840

$\Delta$ U3/3'LTR: bases 7945-8180

SV40 polyadenylation signal: bases 8250-8403

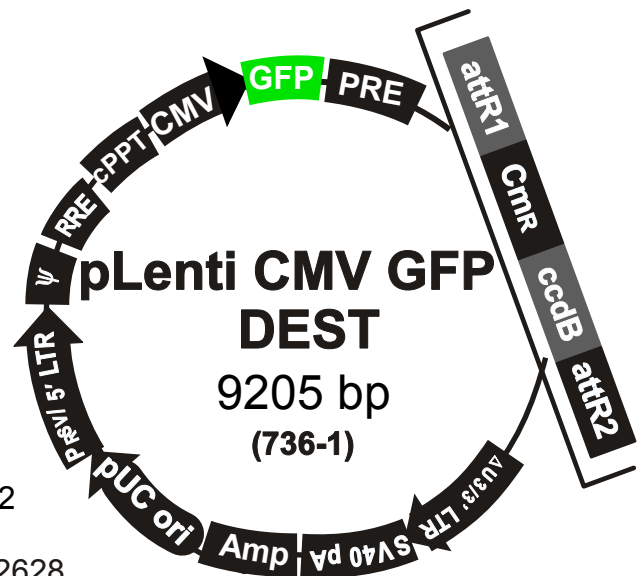

**NOTE: This is not an Invitrogen plasmid. The position of the genetic elements is approximative.**
