# Supplementary material for: A Versatile Viral System for Expression and Depletion of Proteins in Mammalian Cells
Source: PLOS journal article supplement (doi:10.1371/journal.pone.0006529), 2009-08-05
Supplement: S5 (10.1371/journal.pone.0006529.s005) [file journal.pone.0006529.s005]

rrrB T1 transcription termination sequence: bases 106-149  
rrrB T2 transcription termination sequence: bases 281-308  
attL1:bases 358-457 (complementary strand)  
enhanced green fluorescent protein (eGFP): bases 552-1271  
attL2:bases 1296-1396  
Kanamycin resistance gene: bases 1518-2327  
pUC origin: bases 2392-3064

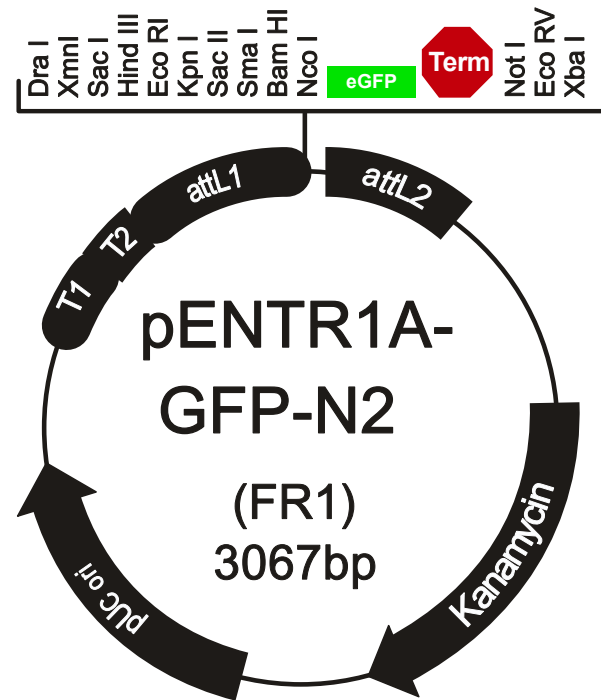

**Dra I**      **Xmn I**                  **Sal I\***                  **Xho I\***                  **Sac I** **Hind III**                  **Eco RI**

| AAA GGA ACC | AAT TCA GTC GAC TGG ATC | TCG AGC TCA | AGC TTC GAA TTC TGC  
Tyr Lys Ser Gly Leu Arg Ser Arg Ala Gln Ala Ser

**Bam HI**

**Pst I\*** **Sal I\***                  **Kpn I**    **Sac II**    **Apa I** **Sma I**                                  **Nco I**

| AGT CGA CGG TAC | CGC | GGG CCC | GGG ATC CAC CGG CCG GTC GCC ACC | **ATG GTG**  
Asn Ser Ala Val Asp Gly Thr Ala Gly Pro Gly Ser Thr Gly Ser **Met**

**Not I**                  **Xho I\***    **Eco RV**    **Xba I**                                  **attL2**

**...eGFP** **Term** AGCGGCCGCACTCGAGATATCTAGACCAGCTTTCTTGTAACAAA

The position of the genetic elements is approximative.

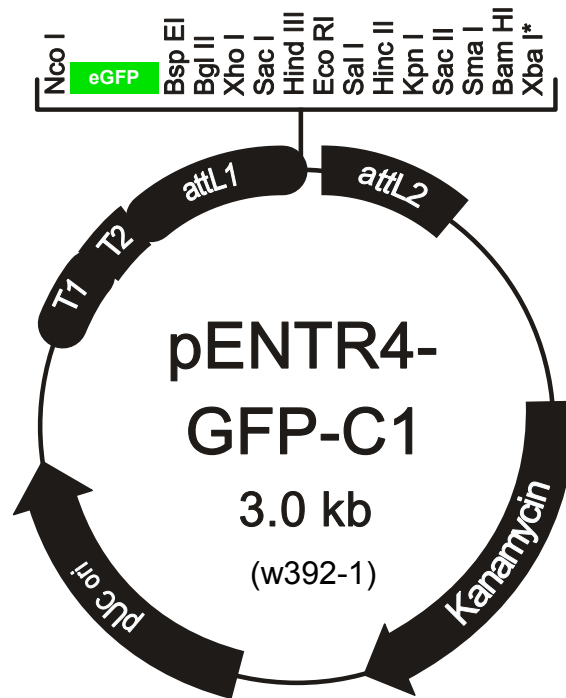

Comments for pENTR4-GFP-C1  
3028 nucleotides

rrnB T1 transcription termination sequence: bases 106-149  
rrnB T2 transcription termination sequence: bases 281-308  
attL1: bases 358-457 (complementary strand)  
enhanced green fluorescent protein (eGFP): bases 463-1179  
multiple cloning site (MCS): bases 1180-1256  
attL2: bases  
Kanamycin resistance gene: bases  
pUC origin: bases

Recommended *E. coli* strain for propagation: TOP10F'

\*Xba I site is methylated. Use methylation deficient strain in order to clone into this site.

# pENTR4 -eGFP C1 MCS

## attL1

GGGCCCCAAA TAATGATTTT ATTTTGACTG ATAGTGACCT GTTCGTTGCA ACAAATTGAT  
CCCGGGGTTT ATTACTAAAA TAAAACTGAC TATCACTGGA CAAGCAACGT TGTTTAACTA

AAG CAA TGC TTT TTT ATA ATG CCA ACT TTG TAC AAA AAA GCA GGC TCC  
TTC GTT ACG AAA AAA TAT TAC GGT TGA AAC ATG TTT TTT CGT CCG AGG

**Nco I** **Bsp EI** **Bgl II** **Xho I** **Sac I** **Hind III**  
**ACC ATG G ... eGFP ...** TAC AAG TCC GGA CTC AGA TCT CGA GCT CAA GCT TCG  
Met Tyr Lys Ser Gly Leu Arg Ser Arg Ala Gln Ala Ser

**Eco RI** **Sal I** **Kpn I** **Sac II** **Apa I, Sma I** **Bam HI** **Xba I**  
AAT TCT GCA GTC GAC GGT ACC GCG GGC CCG GGA TCC ACC GGA **TCT AGA**  
Asn Ser Ala Val Asp Gly Thr Ala Gly Pro Gly Ser Thr Gly Ser Arg

A CCA GCT TTC TTG TAC AAA

## attL2

GTTGGCATT TAAGAAAGCA TTGCTTATCA ATTTGTTGCA ACGAACAGGT CACTATCAGT  
CAACCGTAAT ATTCTTTCGT AACGAATAGT TAAACAACGT TGCTTGTTCCA GTGATAGTCA

CAAAATAAAA TCATTATTTG CCATCCAGCT GCAGCTCTGG CCCGTGTCTC AAAATCTCTG  
GTTTTATTTT AGTAATAAAC GGTAGGTCGA CGTCGAGACC GGGCACAGAG TTTTAGAGAC

ATGTTACATT  
TACAATGTAA

\*\* Please note that there are no stop codons after the Xba I site.

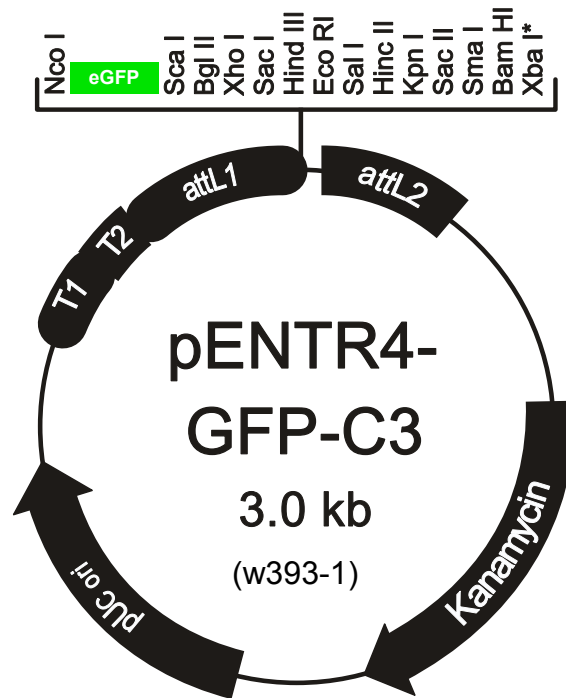

Comments for pENTR4-GFP-C3  
3024 nucleotides

rrnB T1 transcription termination sequence: bases 106-149  
rrnB T2 transcription termination sequence: bases 281-308  
attL1: bases 358-457 (complementary strand)  
enhanced green fluorescent protein (eGFP): bases 463-1179  
multiple cloning site (MCS): bases 1180-1256  
attL2: bases  
Kanamycin resistance gene: bases  
pUC origin: bases

Recommended *E. coli* strain for propagation: TOP10F'

\*Xba I site is methylated. Use methylation deficient strain in order to clone into this site.

# pENTR4 -eGFP-C3 MCS

**atf1**

---

GGGCCCAAA TAATGATTTT ATTTTGACTG ATAGTGACCT GTTCGTTGCA ACAAATTGAT  
 CCCGGGGTTT ATTACTAAAA TAAAACTGAC TATCACTGGA CAAGCAACGT TGTTTAACTA

AAG CAA TGC TTT TTT ATA ATG CCA ACT TTG TAC AAA AAA GCA GGC TCC  
 TTC GTT ACG AAA AAA TAT TAC GGT TGA AAC ATG TTT TTT CGT CCG AGG

**Nco I** **Sca I** **Bgl II** **Xho I** **Sac I** **Hind III** **Eco RI**  
**ACC ATG G ...eGFP...** TAC AAG TAC TCA GAT CTC GAG CTC AAG CTT CGA  
 Met Tyr Lys Tyr Ser Asp Leu Glu Leu Lys Leu Arg

**Sal I** **Kpn I** **Sac II** **Apa I** **Sma I** **Bam HI** **Xba I**  
 ATT CTG CAG TCG ACG GTA CCG CGG GCC CGG GAT CCA CCG GAT **CTA GA**  
 Ile Leu Gln Ser Thr Val Pro Arg Ala Arg Asp Pro Pro Asp Leu

A CCA GCT TTC TTG TAC AAA

**atf2**

---

GTTGGCATT TAAGAAAGCA TTGCTTATCA ATTTGTTGCA ACGAACAGGT CACTATCAGT  
 CAACCGTAAT ATTCTTTCGT AACGAATAGT TAAACAACGT TGCTTGTTCCA GTGATAGTCA

**reverse primer binding site**

CAAAATAAAA TCATTATTTG CCATCCAGCT GCAGCTCTGG CCCGTGTCTC AAAATCTCTG  
 GTTTTATTTT AGTAATAAAC GGTAGGTCGA CGTCGAGACC GGGCACAGAG TTTTAGAGAC

ATGTTACATT  
 TACAATGTAA

\*\*\* Please note that there are no stop codons after the Xba I site.
