# Supplementary material for: A Versatile Viral System for Expression and Depletion of Proteins in Mammalian Cells
Source: PLOS journal article supplement (doi:10.1371/journal.pone.0006529), 2009-08-05
Supplement: S5 (10.1371/journal.pone.0006529.s005) [file journal.pone.0006529.s005]

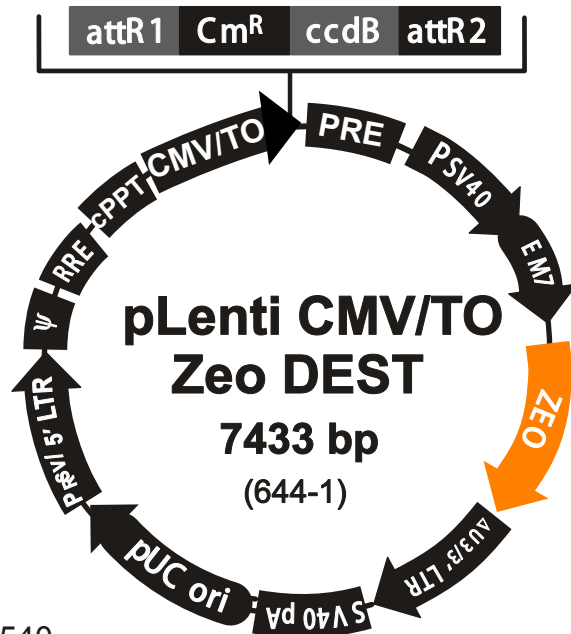

**Comments for pLenti CMV/TO Zeo DEST  
7433 nucleotides**

pUC origin: bases 28-716

RSV/5LTR hybrid promoter: bases 1121-1540

5' splice donor: base

HIV-1 psi ( $\psi$ ) packaging signal: bases 1643-1691

HIV-1 Rev response element (RRE): bases 2180-2438

3' splice acceptor: base 2772

3' splice acceptor: base 2800

Central polypurine tract (cPPT): bases 2916-2980

CMV/TO promoter: bases 3054-3608

attR1 site: bases 3648-3774

Chloramphenicol resistance gene (Cm): bases 3883-4542

ccdB gene: bases 4883-5189

attR2 site: bases 5229-5360

Woodchuck post-transcriptional element (PRE): bases 5384-5977

SV40 early promoter and origin: bases 6037-6353

EM7 promoter: bases 6369-6435

Zeocin resistance gene: bases 6436-6811

$\Delta$ U3/3'LTR: bases 6902-7143

SV40 polyadenylation signal: bases 7207-7371

Recommended *E.coli* strain for propagation: DB3.1 or 'ccDB survival' under zeocin and chloramphenicol selection.
