# Supplementary material for: A Versatile Viral System for Expression and Depletion of Proteins in Mammalian Cells
Source: PLOS journal article supplement (doi:10.1371/journal.pone.0006529), 2009-08-05
Supplement: S5 (10.1371/journal.pone.0006529.s005) [file journal.pone.0006529.s005]

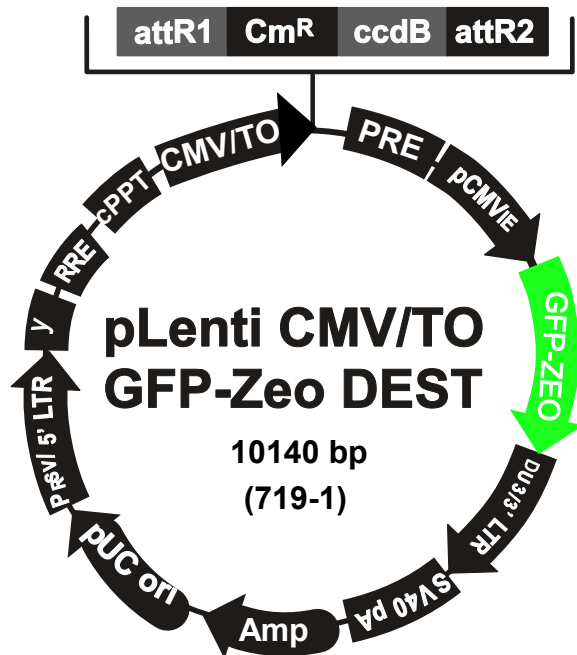

**Comments for pLenti CMV/TO GFP-Zeo DEST  
10140 nucleotides**

bla promoter: bases 32-131  
 ampicillin resistance gene: bases 132-982  
 pUC origin: bases 1138-1808  
 RSV/5LTR hybrid promoter: bases 2212-2632  
 5' splice donor: base  
 HIV-1 psi (γ) packaging signal: bases 2736-2782  
 HIV-1 Rev response element (RRE): bases 3272-3526  
 Central polypurine tract (cPPT): bases 4010-4074  
 CMV/TO promoter: bases  
 attR1 site: bases  
 Chloramphenicol resistance gene (Cm): bases  
 ccdB gene: bases  
 attR2 site: bases  
 Woodchuck post-transcriptional element (PRE): bases  
 Cytomegalovirus immediate early promoter (CMVie): bases  
 GFP-Zeocin resistance gene: bases  
 ΔU3/3'LTR: bases  
 SV40 polyadenylation signal: bases

Recommended E.coli strain for propagation: DB3.1, ccDB survival under ampicillin and chloramphenicol selection.
