# Supplementary material for: A Versatile Viral System for Expression and Depletion of Proteins in Mammalian Cells
Source: PLOS journal article supplement (doi:10.1371/journal.pone.0006529), 2009-08-05
Supplement: S5 (10.1371/journal.pone.0006529.s005) [file journal.pone.0006529.s005]

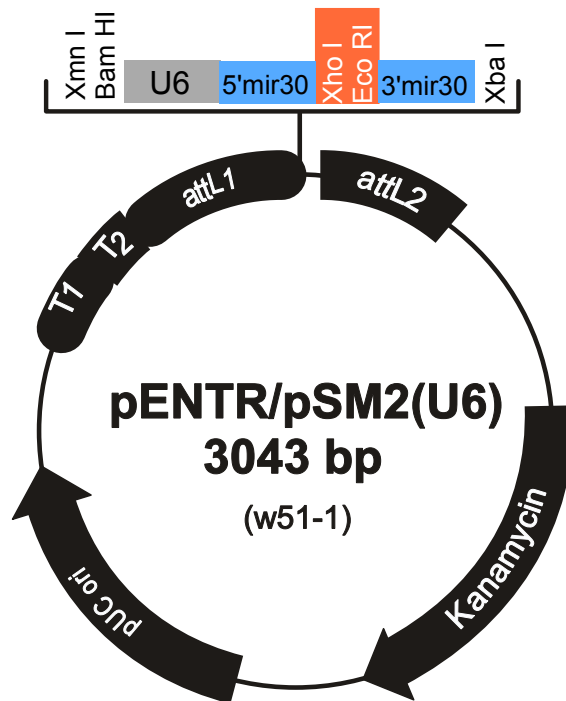

**Comments for pENTR/pSM2(U6)  
3043 nucleotides**

rrrB T1 transcription termination sequence: bases 106-149

rrrB T2 transcription termination sequence: bases 281-308

attL1:bases 358-457 (complementary strand)

U6 RNA promoter: bases 488-989

5'miR30 context: 999-1112

shRNA cloning sites (Xho I/Eco RI):1113-1130

3'miR30 context: 1131-1237

Pol III transcription termination: 1238-1243

attL2: bases 1272-1372

Kanamycin resistance gene: bases 1494-2303

pUC origin: bases 2368-3040

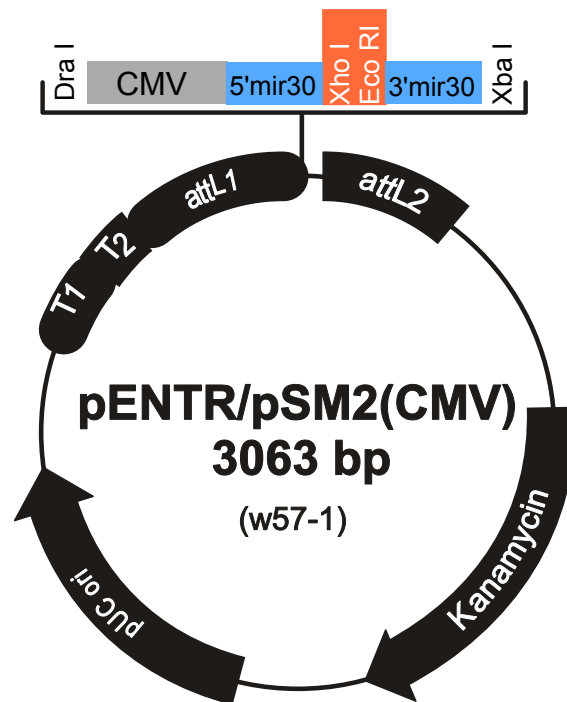

**Comments for pENTR/pSM2(CMV)  
3063 nucleotides**

rrrB T1 transcription termination sequence: bases 106-149

rrrB T2 transcription termination sequence: bases 281-308

attL1:bases 358-457 (complementary strand)

CMV/TO promoter: bases 474-1013

5'miR30 context: 1014-1132

shRNA cloning sites (Xho I/Eco RI):1133-1150

3'miR30 context: 1151-1253

attL2:bases 1292-1392

Kanamycin resistance gene: bases 1514-2335

pUC origin: bases 2407-3060

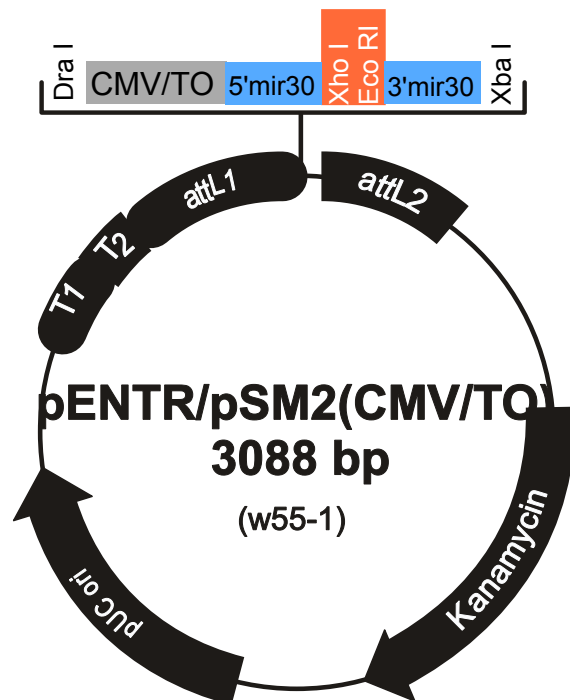

**Comments for pENTR/pSM2(CMV/TO)  
3088 nucleotides**

rrrB T1 transcription termination sequence: bases 106-149

rrrB T2 transcription termination sequence: bases 281-308

attL1:bases 358-457 (complementary strand)

CMV/TO promoter: bases 474-1035

5'miR30 context: 1039-1157

shRNA cloning sites (Xho I/Eco RI):1158-1175

3'miR30 context: 1176-1273

attL2:bases 1317-1417

Kanamycin resistance gene: bases 1539-2361

pUC origin: bases 2431-3086

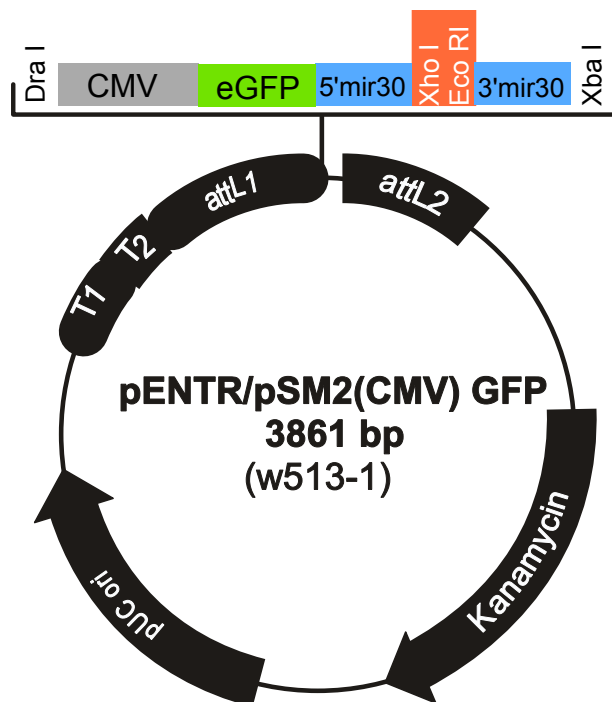

**Comments for pENTR/pSM2(CMV) GFP  
3861 nucleotides**

rrrB T1 transcription termination sequence: bases 106-149

rrrB T2 transcription termination sequence: bases 281-308

attL1: bases 358-457 (complementary strand)

CMV promoter: bases 474-1013

Enhanced green fluorescent protein (eGFP): bases 1083-1802

5'miR30 context: 1813-1930

shRNA cloning sites (Xho I/Eco RI): 1931-1948

3'miR30 context: 1949-2051

attL2: bases 2090-2190

Kanamycin resistance gene: bases 2312-3135

pUC origin: bases 3204-3859

Recommended E.coli strain for propagation: TOP10F'
