# Supplementary material for: A Versatile Viral System for Expression and Depletion of Proteins in Mammalian Cells
Source: PLOS journal article supplement (doi:10.1371/journal.pone.0006529), 2009-08-05
Supplement: S5 (10.1371/journal.pone.0006529.s005) [file journal.pone.0006529.s005]

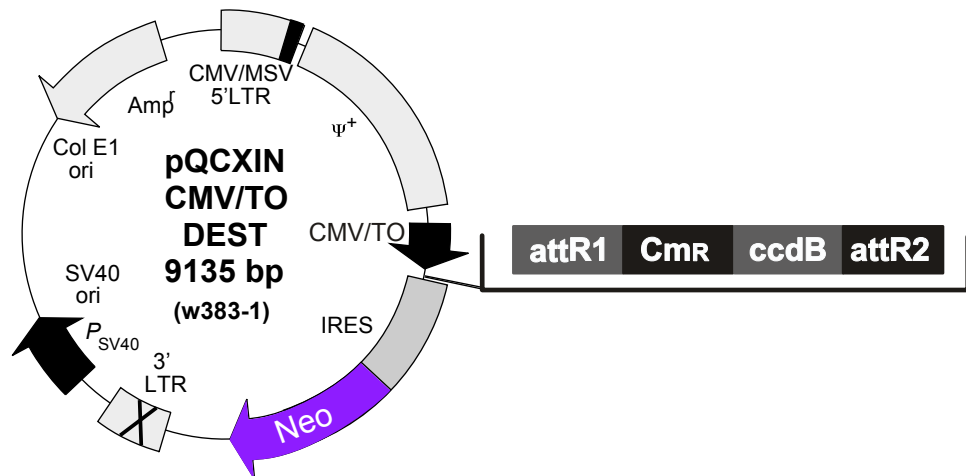

Comments on pQCXIN CMV/TO DEST, 9135 nucleotides:

5' LTR (CMV/MSV): 1–728

Cytomegalovirus (CMV)/ mouse sarcoma virus (MSV) hybrid promoter: 1–511

R region: 584–654

U5 region: 655–728

ψ+ (extended packaging signal): 758–1567

CMV/TO promoter: 1601–2170

attR1:2198–2322

Chloramphenicol resistance gene:2431–3090

ccdB gene:3432–3737

attR2:3778–3900

Internal ribosome entry site (IRES): 4043–4617

Neomycin resistance gene (Neo): 4630–5424

3' MoMuLV LTR (deletion in U3): 5841–6265

SV40 promoter: 6546–6812

SV40 ori: 6767–6832

Col E1 ori (Site of replication initiation): 7153

Ampicillin resistance gene (reverse orientation):8773–7913

Use *E.coli* DB3.1 or ccDB survival strain for propagation.

NOTE: Use of this plasmid in a T-Rex cell line will prevent expression of the Blasticidin selection gene.
