# Supplementary material for: A Versatile Viral System for Expression and Depletion of Proteins in Mammalian Cells
Source: PLOS journal article supplement (doi:10.1371/journal.pone.0006529), 2009-08-05
Supplement: S5 (10.1371/journal.pone.0006529.s005) [file journal.pone.0006529.s005]

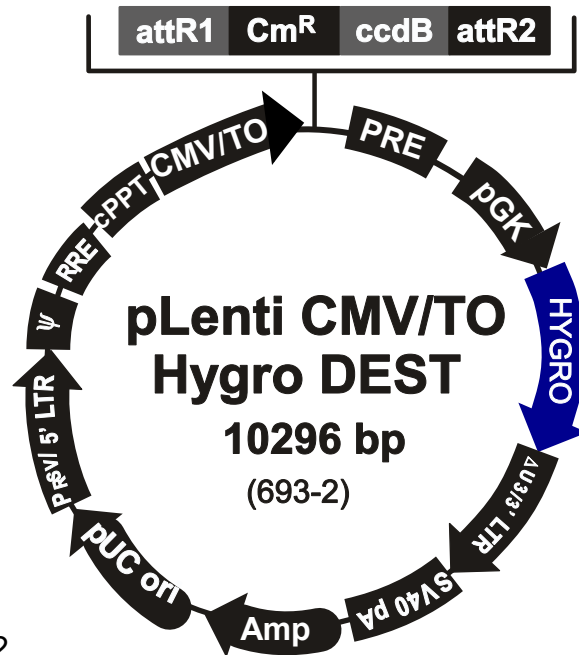

**Comments for pLenti CMV/TO Hygro DEST  
10296 nucleotides**

bla promoter: bases 32-131  
 ampicillin resistance gene: bases 132-992  
 pUC origin: bases 1138-1810  
 RSV/5LTR hybrid promoter: bases 2218-2628  
 HIV-1 psi ( $\psi$ ) packaging signal: bases 2736-2781  
 HIV-1 Rev response element (RRE): bases 3272-3525  
 3' splice acceptor: base 3862  
 3' splice acceptor: base 3901  
 Central polypurine tract (cPPT): bases 4011-4073  
 CMV/TO promoter: bases 4145-4702  
 attR1 site: bases 4740-4864  
 Chloramphenicol resistance gene (Cm): bases 4974-5633  
 ccdB gene: bases 5975-6280  
 attR2 site: bases 6320-6446  
 Woodchuck post-transcriptional element (PRE): bases 6475-7067  
 Murine phosphoglycerate kinase (pGK) promoter: bases 7068-7620  
 Hygromycin resistance gene: bases 7637-8663  
 ΔU3/3' LTR: bases 9037-9270  
 SV40 polyadenylation signal: bases 9341-9495

Recommended *E.coli* strain for propagation: DB3.1 or ccDB survival' under ampicillin and chloramphenicol selection.
