# Supplementary material for: A Versatile Viral System for Expression and Depletion of Proteins in Mammalian Cells
Source: PLOS journal article supplement (doi:10.1371/journal.pone.0006529), 2009-08-05
Supplement: S5 (10.1371/journal.pone.0006529.s005) [file journal.pone.0006529.s005]

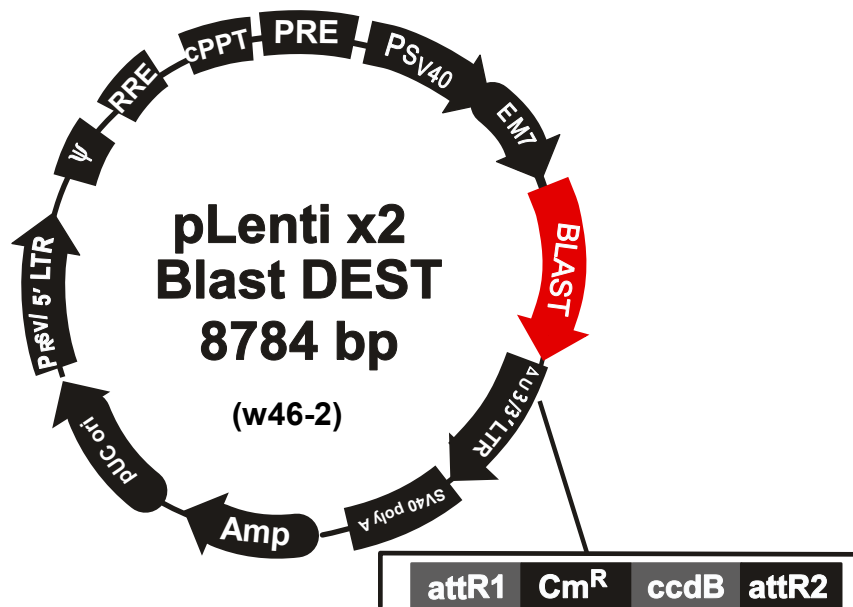

**Comments for pLenti X2 Blast DEST  
8784 nucleotides**

bla promoter: bases 32-131

ampicillin resistance gene: bases 132-992

pUC origin: bases 1138-1810

RSV/5LTR hybrid promoter: bases 2218-2628

HIV-1 psi ( $\psi$ ) packaging signal: bases 2736-2781

HIV1 Rev response element (RRE): bases 3272-3525

3' splice acceptor: base 3862

3' splice acceptor: base 3901

Central polypurine tract (cPPT): bases 4011-4073

Woodchuck post-transcriptional element (PRE): bases 4182-4774

SV40 promoter: bases 4823-5164

EM7 promoter: bases 5205-5270

Blasticidin resistance gene: bases 5271-5669

$\Delta$ U3/3'LTR: bases 5690-7757

attR2 site: bases 5923-5799

ccdB gene: bases 6269-5964

Chloramphenicol resistance gene (Cm): bases 7270-6611

attR1 site: bases 7504-7380

SV40 polyadenylation signal: bases 7829-7983

Recommended *E.coli* strain for propagation: DB3.1 or ccDB survival.
