# Supplementary material for: A Versatile Viral System for Expression and Depletion of Proteins in Mammalian Cells
Source: PLOS journal article supplement (doi:10.1371/journal.pone.0006529), 2009-08-05
Supplement: S5 (10.1371/journal.pone.0006529.s005) [file journal.pone.0006529.s005]

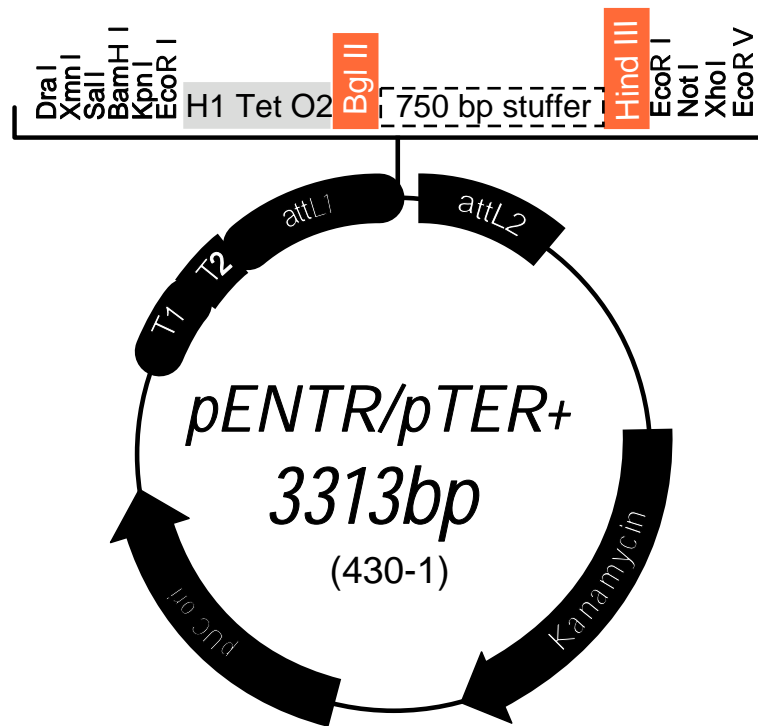

*Comments for pENTR/pTER+*  
 3313 nucleotides

**rrnB** T1 transcription termination sequence: bases 106-149

**rrnB** T2 transcription termination sequence: bases 281-308

**attL1**: bases 358-457 (complementary strand)

**H1 RNA promoter**: bases 494-715

**750 bp stuffer**: bases 716-1472

**attL2**: bases 1542-1640

**Kanamycin resistance gene**: bases 1764-2573

**pUC origin**: bases 2635-3308
