# Supplementary material for: A Versatile Viral System for Expression and Depletion of Proteins in Mammalian Cells
Source: PLOS journal article supplement (doi:10.1371/journal.pone.0006529), 2009-08-05
Supplement: S5 (10.1371/journal.pone.0006529.s005) [file journal.pone.0006529.s005]

PreScission  
cleavage site

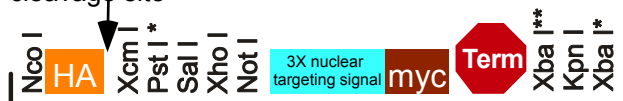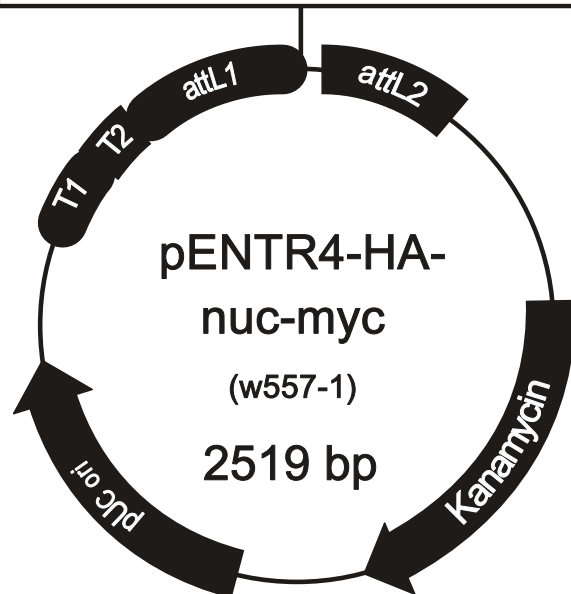

rrnB T1 transcription termination sequence: bases 106-149

rrnB T2 transcription termination sequence: bases 281-308

attL1:bases 358-457 (complementary strand)

HA tag: bases 463-495

PreScission cleavage site: bases 516-517

Multiple cloning site (MCS): bases 523-581

3X nuclear localization signal (SV40): bases 583-654

myc tag: bases 667-696

stop codon: bases 709-711

att L2: bases 746-846

Kanamycin resistance gene: bases 970-1779

pUC origin: bases 1846-2516

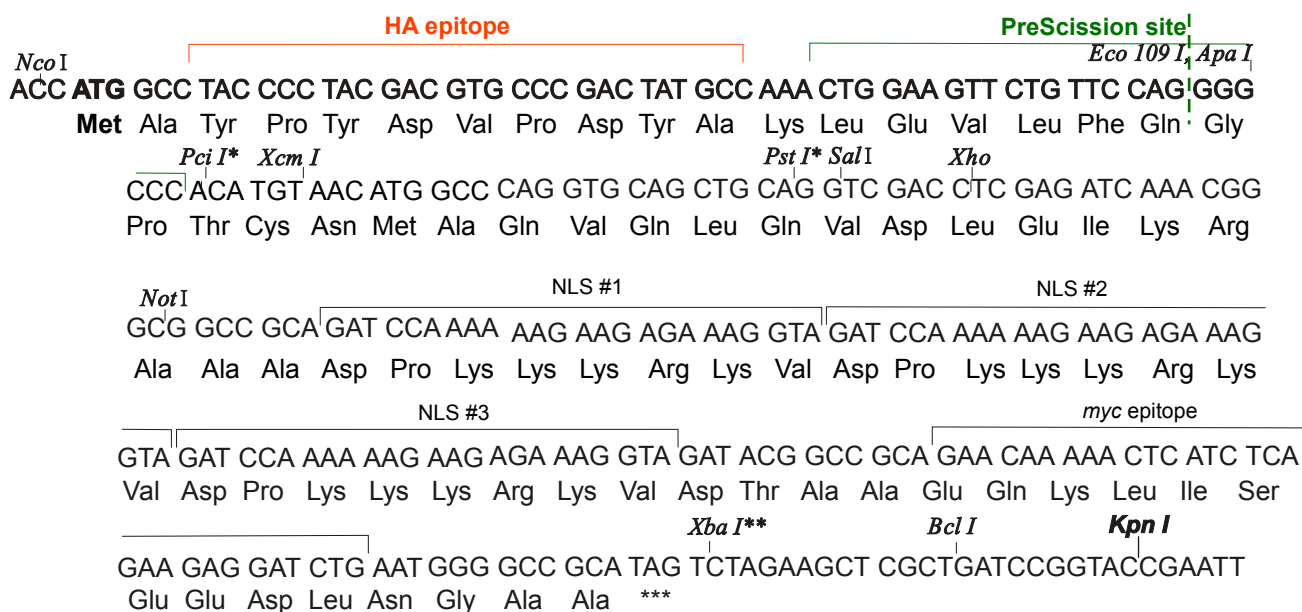

\*Site is not unique

\*\* Site is methylated in original vector (pCMV/myc/nuc)

The position of the genetic elements is approximative

Recommended *E.coli* strain for propagation: TOP10F'
