# Supplementary material for: A Versatile Viral System for Expression and Depletion of Proteins in Mammalian Cells
Source: PLOS journal article supplement (doi:10.1371/journal.pone.0006529), 2009-08-05
Supplement: S5 (10.1371/journal.pone.0006529.s005) [file journal.pone.0006529.s005]

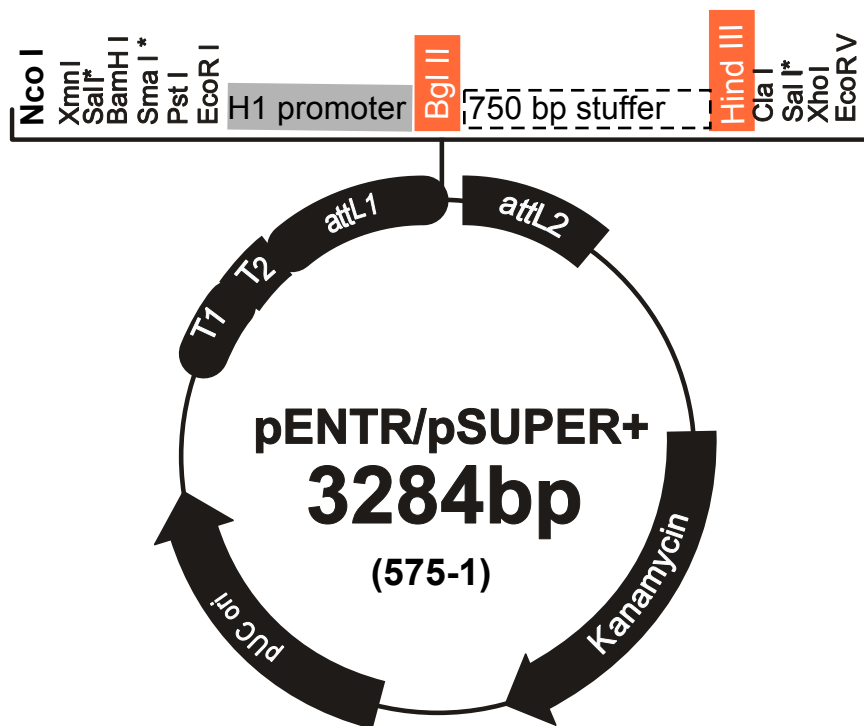

**Comments for pENTR/pSUPER+  
3313 nucleotides**

rrrB T1 transcription termination sequence: bases 106-149

rrrB T2 transcription termination sequence: bases 281-308

attL1: bases 358-457 (complementary strand)

H1 RNA promoter: bases 494-715

750 bp stuffer: bases 716-1472

attL2: bases 1542-1640

Kanamycin resistance gene: bases 1764-2573

pUC origin: bases 2635-3284

\*Sites are not unique

Recommended *E.coli* strain for propagation: TOP10F'
