# Supplementary material for: A Versatile Viral System for Expression and Depletion of Proteins in Mammalian Cells
Source: PLOS journal article supplement (doi:10.1371/journal.pone.0006529), 2009-08-05
Supplement: S5 (10.1371/journal.pone.0006529.s005) [file journal.pone.0006529.s005]

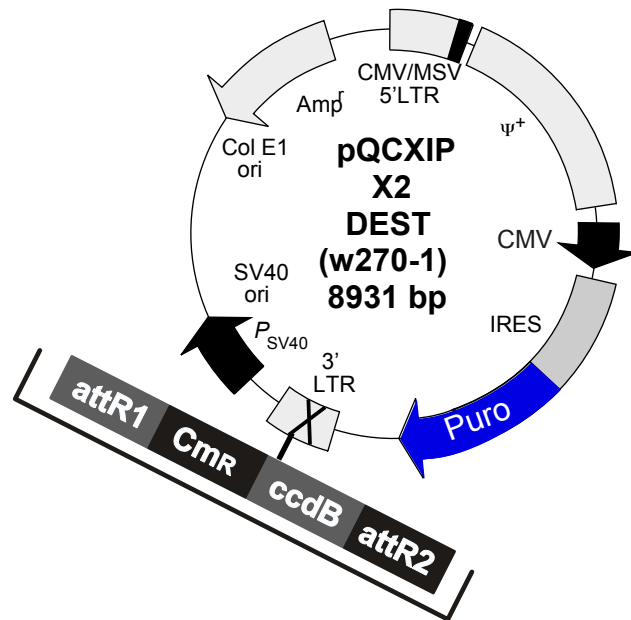

### Comments on pQCXIP X2 DEST, 8931 nucleotides:

5' LTR (CMV/MSV): 1–728

Cytomegalovirus (CMV)/ mouse sarcoma virus (MSV) hybrid promoter: 1–511

R region: 584–654

U5 region: 655–728

y+ (extended packaging signal): 758–1567

CMV promoter: 1601–2170

Internal ribosome entry site (IRES): 2289–2862

Puromycin resistance gene (Puro): 2895–3494

3' MoMuLV LTR (deletion in U3): 3868–6062

attR2: 4060–3934

ccdB gene: 4404–4099

Chloramphenicol resistance gene: 5405–4746

attR1: 5638–5515

SV40 promoter: 6341–6608

SV40 ori: 6563–6629

Col E1 ori (Site of replication initiation): 6950

Ampicillin resistance gene (reverse orientation): 8569–7707

Use *E.coli* DB3.1 or ccDB survival strain for propagation.

NOTE: Use of this plasmid in a T-Rex cell line will prevent expression of the Neomycin selection gene.
