# Supplementary material for: A Versatile Viral System for Expression and Depletion of Proteins in Mammalian Cells
Source: PLOS journal article supplement (doi:10.1371/journal.pone.0006529), 2009-08-05
Supplement: S5 (10.1371/journal.pone.0006529.s005) [file journal.pone.0006529.s005]

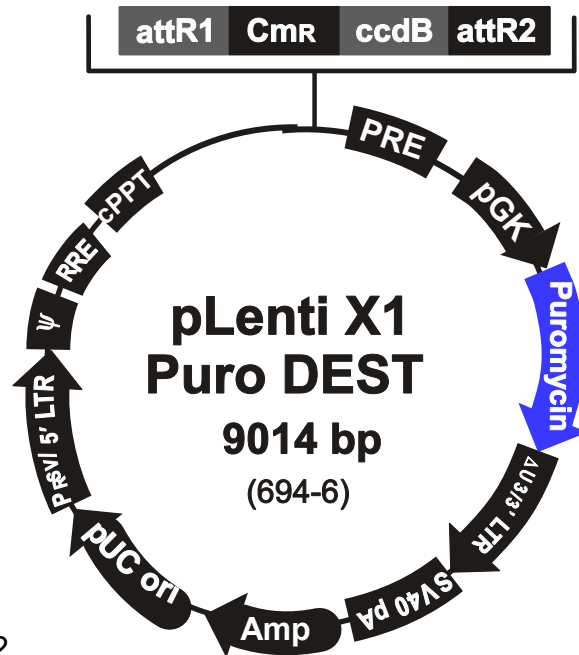

**Comments for pLenti X1 Puro DEST  
9014 nucleotides**

bla promoter: bases 32-131  
 ampicillin resistance gene: bases 132-992  
 pUC origin: bases 1138-1810  
 RSV/5LTR hybrid promoter: bases 2218-2628  
 HIV-1 psi ( $\psi$ ) packaging signal: bases 2736-2781  
 HIV-1 Rev response element (RRE): bases 3272-3525  
 3' splice acceptor: base 3862  
 3' splice acceptor: base 3901  
 Central polypurine tract (cPPT): bases 4011-4073  
 attR1 site: bases 4159-4285  
 Chloramphenicol resistance gene (Cm): bases 4394-5053  
 ccdB gene: bases 5395-5700  
 attR2 site: bases 5741-5866  
 Woodchuck post-transcriptional element (PRE): bases 5896-6487  
 Murine phosphoglycerate kinase (pGK) promoter: bases 6490-6998  
 Puromycin resistance gene: bases 7018-7617  
 $\Delta$ U3/3' LTR: bases 7756-7988  
 SV40 polyadenylation signal: bases 8060-8212

Suggested E.coli strain: DB3.1 or ccDB survival

**NOTE: The position of the genetic elements is approximative.**
