# Supplementary material for: A Versatile Viral System for Expression and Depletion of Proteins in Mammalian Cells
Source: PLOS journal article supplement (doi:10.1371/journal.pone.0006529), 2009-08-05
Supplement: S5 (10.1371/journal.pone.0006529.s005) [file journal.pone.0006529.s005]

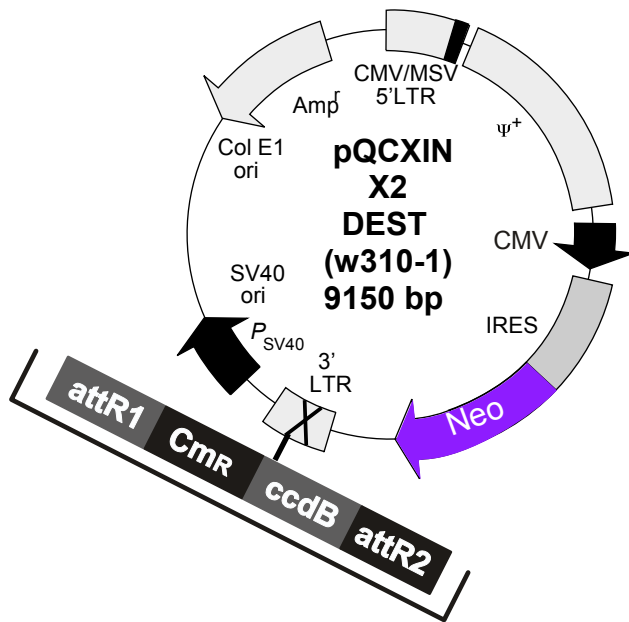

Comments on pQCXIN CMV/TO DEST, 9150 nucleotides:

5' LTR (CMV/MSV): 1–728  
 Cytomegalovirus (CMV)/ mouse sarcoma virus (MSV) hybrid promoter: 1–511  
 R region: 584–654  
 U5 region: 655–728  
 y+ (extended packaging signal): 758–1567  
 CMV promoter: 1601–2170  
 Internal ribosome entry site (IRES): 2289–2862  
 Neomycin resistance gene (NEO): 2876–3670  
 3' MoMuLV LTR (deletion in U3): 4077–6281  
 attR2: 4277–4152  
 ccdB gene: 4622–4318  
 Chloramphenicol resistance gene: 5624–4965  
 attR1: 5858–5734  
 SV40 promoter: 6560–6827  
 SV40 ori: 6782–6846  
 Col E1 ori (Site of replication initiation): 7168  
 Ampicillin resistance gene (reverse orientation): 8788–7928

Use *E.coli* DB3.1 or ccDB survival strain for propagation.

NOTE: Use of this plasmid in a T-Rex cell line will prevent expression of the Neomycin selection gene.
