# Supplementary material for: A Versatile Viral System for Expression and Depletion of Proteins in Mammalian Cells
Source: PLOS journal article supplement (doi:10.1371/journal.pone.0006529), 2009-08-05
Supplement: S5 (10.1371/journal.pone.0006529.s005) [file journal.pone.0006529.s005]

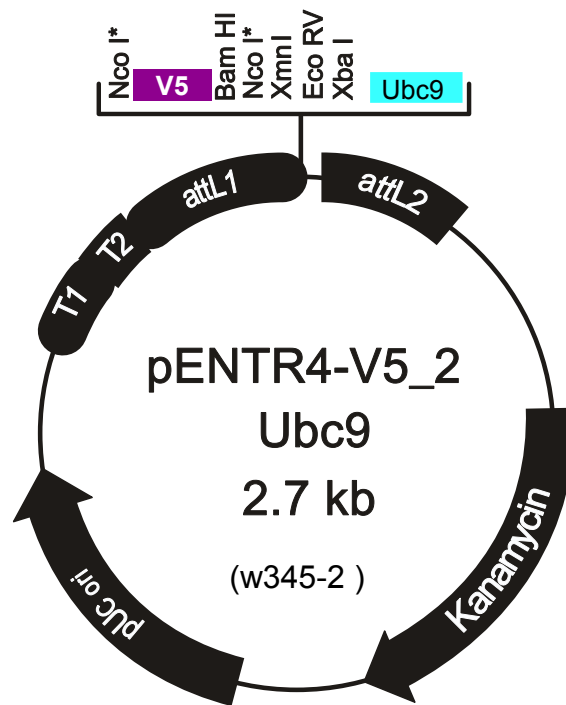

rrrB T1 transcription termination sequence: bases 106-149  
 rrrB T2 transcription termination sequence: bases 281-308  
 attL1: bases 358-457 (complementary strand)  
 multiple cloning site (MCS): bases  
 attL2: bases  
 Kanamycin resistance gene: bases  
 pUC origin: bases

Recommended *E.coli* strain for propagation: TOP10F'

\* Site is not unique

# pENTR4 -V5\_2 Ubc9 MCS

**atf1.1**

GGGCCCCAAA TAATGATTTT ATTTTGACTG ATAGTGACCT GTTCGTTGCA ACAAATTGAT  
CCCGGGGTTT ATTACTAAAA TAAAACTGAC TATCACTGGA CAAGCAACGT TGTTTAACTA

AAG CAA TGC TTT TTT ATA ATG CCA ACT TTG TAC AAA AAA GCA GGC TCC  
TTC GTT ACG AAA AAA TAT TAC GGT TGA AAC ATG TTT TTT CGT CCG AGG

**Nco I\***

V5 epitope

**ACC ATG GAA GGT AAG CCT ATC CCT AAC CCT CTC CTC GGT CTC GAT TCT ACG**  
**Met** Glu Gly Lys Pro Ile Pro Asn Pro Leu Leu Gly Leu Asp Ser Thr

**BamHI**

**Nco I\***

**XmnI**

**EcoRV Xba I**

**GGA TCC ATG GGA ACC AAT TCA GTC GAG ATA TCT AGA GGT GGC TCT GGT GGC**  
Gly Ser Met Gly Thr Asn Ser Val Glu Ile Ser Arg Gly Gly Ser Gly Gly

**Ubc9**

**Term**

CTAGACCCAG CTTTCTTGTA CAAA  
GATCTGGGTC GAAAGAACAT GTTT

**atf1.2**

GTTGGCATT TAAGAAAGCA TTGCTTATCA ATTTGTTGCA ACGAACAGGT CACTATCAGT  
CAACCGTAAT ATTCTTTCGT AACGAATAGT TAAACAACGT TGCTTGTTCCA GTGATAGTCA

**reverse primer binding site**

CAAAATAAAA TCATTATTTG CCATCCAGCT GCAGCTCTGG CCCGTGTCTC AAAATCTCTG  
GTTTTATTTT AGTAATAAAC GGTAGGTCGA CGTCGAGACC GGGCACAGAG TTTTAGAGAC

ATGTTACATT  
TACAATGTAA

\* Site not unique
