# Supplementary material for: A Versatile Viral System for Expression and Depletion of Proteins in Mammalian Cells
Source: PLOS journal article supplement (doi:10.1371/journal.pone.0006529), 2009-08-05
Supplement: S5 (10.1371/journal.pone.0006529.s005) [file journal.pone.0006529.s005]

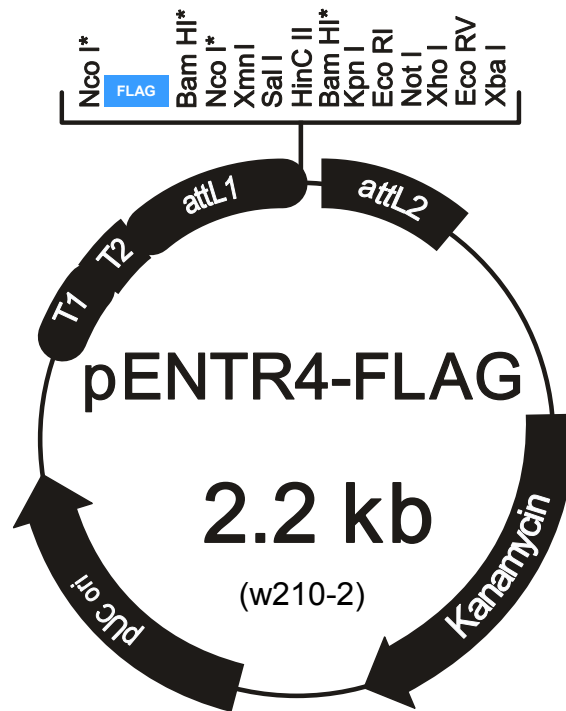

Comments for pENTR4-FLAG  
nucleotides

rrnB T1 transcription termination sequence: bases 106-149

rrnB T2 transcription termination sequence: bases 281-308

attL1: bases 358-457 (complementary strand)

multiple cloning site (MCS): bases

attL2: bases

Kanamycin resistance gene: bases

pUC origin: bases

Recommended *E.coli* strain for propagation: TOP10F'

\* Sites are not unique

## pENTR4 -FLAG MCS

$\overbrace{\text{GGGCCCCAAA TAATGATTTT ATTTTGACTG ATAGTGACCT GTTCGTTGCA ACAAATTGAT}}^{\text{attL1}}$   
 $\text{CCCGGGGTTT ATTACTAAAA TAAAACTGAC TATCACTGGA CAAGCAACGT TGTTTAACTA}$

|     |     |     |     |     |     |     |     |     |     |     |     |     |     |     |     |
|-----|-----|-----|-----|-----|-----|-----|-----|-----|-----|-----|-----|-----|-----|-----|-----|
| AAG | CAA | TGC | TTT | TTT | ATA | ATG | CCA | ACT | TTG | TAC | AAA | AAA | GCA | GGC | TCC |
| TTC | GTT | ACG | AAA | AAA | TAT | TAC | GGT | TGA | AAC | ATG | TTT | TTT | CGT | CCG | AGG |

*Nco I*\*                      FLAG epitope                      BamHI\*    *Nco I*\*

**ACC ATG GAT TAC AAG GAC GAT GAC GAC AAA CTC GGA TCC ATG**

**Met Asp Tyr Lys Asp Asp Asp Asp Lys Leu Gly Ser Met**

*Xmn*I                      *Sal*I   *Hin*C II   BamHI\*                      *Kpn*I   *Eco*R I                      *Not*I  
GGA|ACC AAT TCA GTC|GAC TGG ATC CGG TAC|CGA ATT CGC|GGC  
Gly Thr Asn Ser Val Asp Trp Ile Arg Tyr Arg Ile Arg Gly

*Xho*I      *Eco*RV   *Xba*I  
**CGC ACT CGA GAT ATC TAG** ACC AGC TTT CTT GTA CAA A  
 Arg Thr Arg Asp Ile \*

| <i>atl2</i>                        |            |            |            |                         |            |
|------------------------------------|------------|------------|------------|-------------------------|------------|
| GTTGGCATT                          | TAAGAAAGCA | TTGCTTATCA | ATTTGTTGCA | ACGAACAGGT              | CACTATCAGT |
| CAACCGTAAT                         | ATTCTTTCGT | AACGAATAGT | TAAACAACGT | TGCTTGTCCA              | GTGATAGTCA |
| <b>reverse primer binding site</b> |            |            |            |                         |            |
| CAAAATAAAA                         | TCATTATTTG | CCATCCAGCT | GCAGCTCTGG | CCC <sup>GT</sup> GTCTC | AAAATCTCTG |
| GTTTTATTTT                         | AGTAATAAAC | GGTAGGTCGA | CGTCGAGACC | GGGCACAGAG              | TTTTAGAGAC |

ATGTTACATT  
TACAATGTAA

\* Sites not unique
