# Supplementary material for: A Versatile Viral System for Expression and Depletion of Proteins in Mammalian Cells
Source: PLOS journal article supplement (doi:10.1371/journal.pone.0006529), 2009-08-05
Supplement: S5 (10.1371/journal.pone.0006529.s005) [file journal.pone.0006529.s005]

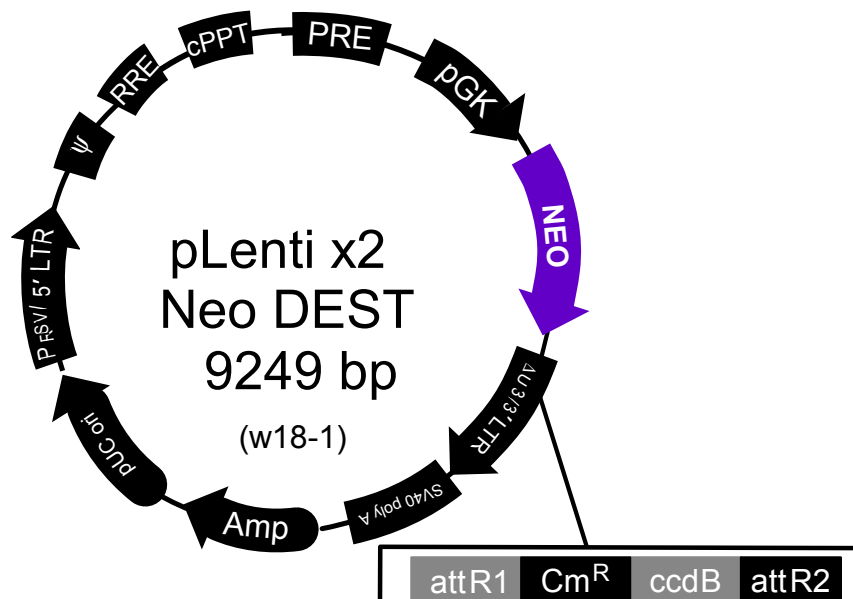

Comments for pLenti X2 Neo DEST  
9249 nucleotides

bla promoter: bases 32-131  
 ampicillin resistance gene: bases 132-992  
 pUC origin: bases 1138-1810  
 RSV/5LTR hybrid promoter: bases 2218-2628  
 HIV-1 psi ( $\psi$ ) packaging signal: bases 2736-2781  
 HIV1 Rev response element (RRE): bases 3272-3525  
 3' splice acceptor: base 3862  
 3' splice acceptor: base 3901  
 Central polypurine tract (cPPT): bases 4011-4073  
 Woodchuck post-transcriptional element (PRE): bases 4182-4774  
 Murine phosphoglycerate kinase (pGK) promoter: bases 4805-5313  
 Neomycin resistance gene: bases 5327-6130  
 $\Delta$ U3/3'LTR: bases 6155-8222  
 attR2 site: bases 6388-6264  
 ccdB gene: bases 6734-6429  
 Chloramphenicol resistance gene (Cm): bases 7735-7076  
 attR1 site: bases 7969-7845  
 SV40 polyadenylation signal: bases 8294-8449

Recommended E.coli strain for propagation: DB3.1 or ccDB survival.

NOTE: This is not an Invitrogen plasmid. The position of the genetic elements is approximative.

Eric Campeau September 2005
