# Supplementary material for: A Versatile Viral System for Expression and Depletion of Proteins in Mammalian Cells
Source: PLOS journal article supplement (doi:10.1371/journal.pone.0006529), 2009-08-05
Supplement: S5 (10.1371/journal.pone.0006529.s005) [file journal.pone.0006529.s005]

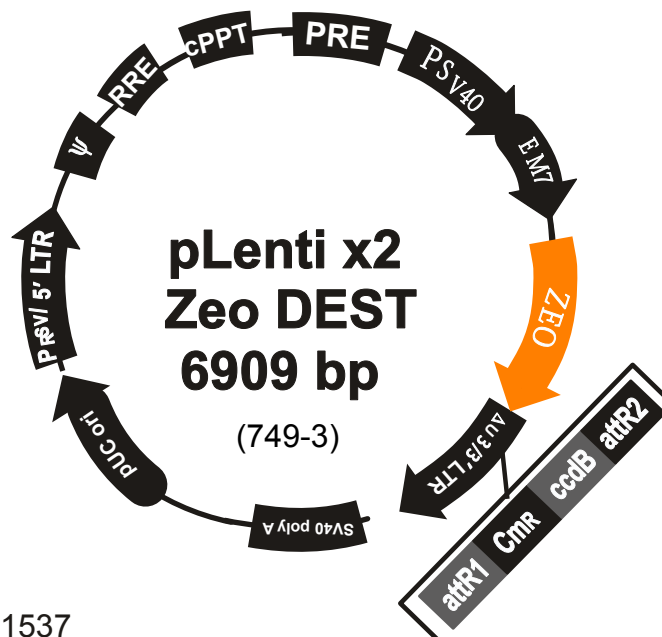

**Comments for pLenti X2 Zeo DEST  
6909 nucleotides**

pUC origin: bases 48-714  
 RSV/5LTR hybrid promoter: bases 1127-1537  
 HIV-1 psi ( $\psi$ ) packaging signal: bases 1645-1690  
 HIV-1 Rev response element (RRE): bases 2181-2436  
 3' splice acceptor: base 2779  
 3' splice acceptor: base 2807  
 Central polypurine tract (cPPT): bases 2920-2982  
 Woodchuck post-transcriptional element (PRE): bases 3091-3684  
 SV40 early promoter and origin: bases 3748-4074  
 EM7 promoter: bases 4078-4143  
 Zeocin resistance gene: bases 4144-4518  
 $\Delta$ U3/3'LTR: bases 4612-6613  
 attR2 site: bases 4779-4654  
 ccdB gene: bases 5124-4819  
 Chloramphenicol resistance gene (Cm): bases 6125-5466  
 attR1 site: bases 6360-6235  
 SV40 polyadenylation signal: bases 6684-6837

**NOTE:** This vector does not carry the ampicillin resistance gene and is selected with Zeocin (50 ug/ml in low salt LB) in *E.coli*.

Recommended *E.coli* strain for propagation: DB3.1 or ccDB survival.  
 The position of the genetic elements is approximative.
