# Supplementary material for: A Versatile Viral System for Expression and Depletion of Proteins in Mammalian Cells
Source: PLOS journal article supplement (doi:10.1371/journal.pone.0006529), 2009-08-05
Supplement: S5 (10.1371/journal.pone.0006529.s005) [file journal.pone.0006529.s005]

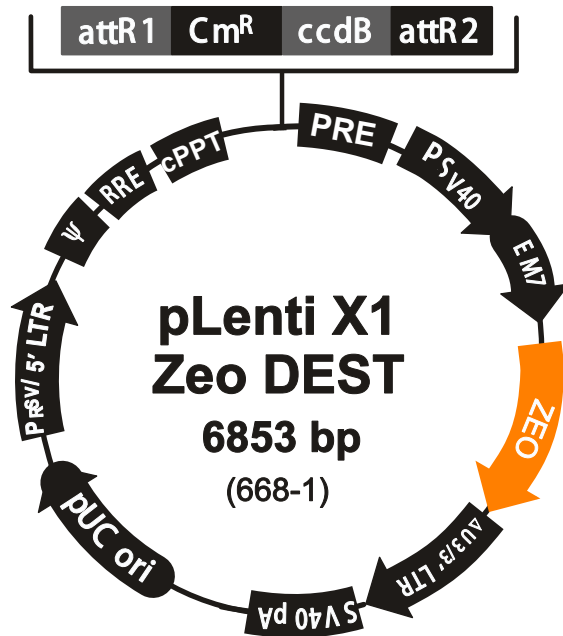

**Comments for pLenti X1 Zeo DEST**  
**6853 nucleotides**

pUC origin: bases 28-716

RSV/5LTR hybrid promoter: bases 1121-1540

5' splice donor: base

HIV-1 psi ( $\psi$ ) packaging signal: bases 1643-1691

HIV-1 Rev response element (RRE): bases 2180-2438

3' splice acceptor: base 2772

3' splice acceptor: base 2800

Central polypurine tract (cPPT): bases 2916-2980

attR1 site: bases 3068-3195

Chloramphenicol resistance gene (Cm): bases 3230-3962

ccdB gene: bases 4304-4609

attR2 site: bases 4649-4781

Woodchuck post-transcriptional element (PRE): bases 4804-5397

SV40 early promoter and origin: bases 5456-5780

EM7 promoter: bases 5788-5856

Zeocin resistance gene: bases 5857-6231

$\Delta$ U3/3'LTR: bases 6322-6564

SV40 polyadenylation signal: bases 6628-6792

**NOTE: Use Zeocin and chloramphenicol to propagate the plasmid in *E.coli*. Use strain DB3.1 or ccdB survival.**

**Location of the genetic elements is approximative.**
