# Supplementary material for: A Versatile Viral System for Expression and Depletion of Proteins in Mammalian Cells
Source: PLoS One. 2009 Aug 6;4(8):e6529. doi: 10.1371/journal.pone.0006529 (PMC2717805; doi:10.1371/journal.pone.0006529)
Supplement: Table S1 — Plasmids submitted to Addgene. (0.04 MB XLS) [file pone.0006529.s004.xls]

## Sheet: Sheet1
Campeau et al. Table S1. Plasmids submitted to Addgene
Plasmid name	Description
pEF-ENTR A (696-6)	Entry vector with EF1-a promoter, V5-His C-term, frame A
pEF-ENTR B (708-1)	Entry vector with EF1-a promoter, V5-His C-term, frame B
pEF-ENTR C (709-1)	Entry vector with EF1-a promoter, V5-His C-term, frame C
pEF-ENTR-LacZ (710-1)	Entry vector with EF1-a promoter, V5-His C-term, Lac Z control
pENTR-LUC (w158-1)	Entry vector, Firefly Luciferase
pENTR/pSM2(CMV) (w57-1)	Entry vector for miRNA expression under CMV promoter
pENTR/pSM2(CMV) GFP (w513-1)	Entry vector for miRNA expression under CMV promoter and GFP reporter
pENTR/pSM2(CMV/TO) (w55-1)	Entry vector for miRNA expression under CMV/TO promoter
pENTR/pSM2(U6) (w51-1)	Entry vector for miRNA expression under U6 promoter
pENTR/pSUPER+ (575-1)	Entry vector for shRNA expression under H1 promoter
pENTR/pTER shEGFP #1 (628-2)	Entry vector for EGFPshRNA#1 under H1/TO promoter
pENTR/pTER shEGFP #2 (728-2)	Entry vector for EGFPshRNA#2 under H1/TO promoter
pENTR/pTER shLUC (w177-1)	Entry vector for Firefly Luciferase shRNA under H1/TO promoter
pENTR/pTER+ (430-1)	Entry vector for shRNA expression under H1/TO promoter
pENTR1A-GFP-N2 (FR1)	Entry vector for C-term eGFP fusion, frame N2
pENTR1A no ccDB (w48-1)	Entry 1A vector, no ccDB gene
pENTR1A-FKBP12DD C-term (w350-2)	Entry vector for Degron, C-term
pENTR1A-NTAP-A (w322-1)	Entry vector for NTAP, frame A
pENTR1A-NTAP-B (w323-1)	Entry vector for NTAP, frame B
pENTR1A-NTAP-C (w324-1)	Entry vector for NTAP, frame C
pENTR4 no ccDB (686-1)	Entry vector, no ccDB gene
pENTR4-FKBP12DD N-term A (B3-1)	Entry vector for Degron, N-term, frame A
pENTR4-FKBP12DD N-term B (w385-4)	Entry vector for Degron, N-term, frame B
pENTR4-FKBP12DD N-term C (w385-10)	Entry vector for Degron, N-term, frame C
pENTR4-FLAG (w210-2)	Entry vector for N-term FLAG fusion
pENTR4-GFP-C1 (w392-1)	Entry vector for N-term eGFP fusion, frame C1
pENTR4-GFP-C3 (w393-1)	Entry vector for N-term eGFP fusion, frame C3
pENTR4-GST 6P-1 (w487-1)	Entry vector for N-term GST fusion, frame 6P-1
pENTR4-HA-nuc-myc (w557-1)	Entry vector for nuclear targeting of domains (N-term HA , C-term myc tags)
pENTR4-nuc-myc (w556-1)	Entry vector for nuclear targeting of domains (C-term myc tag)
pENTR4-V5 (w71-3)	Entry vector for N-term V5 fusion, frame A
pENTR4-V5-2 (w234-1)	Entry vector for N-term V5 fusion, frame B
pENTR4-V5-2-Ubc9 (w345-2)	Entry vector for N-term V5 fusion, frame B and Ubc9 C-term
pENTR4-V5-LUC (w468-1)	Entry vector, V5-Luciferase control
pL106P-LUC-ENTR1A(w451-1)	Entry vector, Degron N-term Luciferase control
pLenti CMV Blast DEST (706-1)	Lentiviral Destination vector, expression, CMV promoter, Blast
pLenti CMV Blast empty (w263-1)	Lentiviral empty control vector, CMV promoter, Blast
pLenti CMV GFP Blast (659-1)	Lentiviral eGFP expression vector, CMV promoter, Blast
pLenti CMV GFP DEST (736-1)	Lentiviral Destination vector, expression/RNAi, eGFP co-expression
pLenti CMV GFP Hygro (656-4)	Lentiviral eGFP expression vector, CMV promoter, Hygro
pLenti CMV GFP Neo (657-2)	Lentiviral eGFP expression vector, CMV promoter, Neo
pLenti CMV GFP Puro (658-5)	Lentiviral eGFP expression vector, CMV promoter, Puro
pLenti CMV GFP Zeo (637-7)	Lentiviral eGFP expression vector, CMV promoter, Zeo
pLenti CMV Hygro DEST (w117-1)	Lentiviral Destination vector, expression, CMV promoter, Hygro
pLenti CMV Neo DEST (705-1)	Lentiviral Destination vector, expression, CMV promoter, Neo
pLenti CMV Puro DEST (w118-1)	Lentiviral Destination vector, expression, CMV promoter, Puro
pLenti CMV Puro LUC (w168-1)	Lentiviral Luciferase expression vector, CMV promoter, Puro
pLenti CMV V5-LUC Blast (w567-1)	Lentiviral V5-Luciferase expression vector, CMV promoter, Blast
pLenti CMV/TO DEST (775-1)	Lentiviral Destination vector, expression, CMV/TO promoter
pLenti CMV/TO eGFP Puro (w159-1)	Lentiviral eGFP expression vector, CMV/TO promoter, Puro
pLenti CMV/TO GFP-Zeo DEST (719-1)	Lentiviral Destination vector, expression, CMV/TO promoter, GFP-Zeo
pLenti CMV/TO Hygro DEST (693-2)	Lentiviral Destination vector, expression, CMV/TO promoter, Hygro
pLenti CMV/TO Hygro empty (w214-1)	Lentiviral empty control vector, CMV/TO promoter, Hygro
pLenti CMV/TO Neo DEST (685-3)	Lentiviral Destination vector, expression, CMV/TO promoter, Neo
pLenti CMV/TO Neo empty (w215-1)	Lentiviral empty control vector, CMV/TO promoter, Neo
pLenti CMV/TO Puro DEST (670-1)	Lentiviral Destination vector, expression, CMV/TO promoter, Puro
pLenti CMV/TO Puro empty (w175-1)	Lentiviral empty control vector, CMV/TO promoter, Puro
pLenti CMV/TO V5-LUC Puro (w549-1)	Lentiviral V5-Luciferase expression vector, CMV/TO promoter, Puro
pLenti CMV/TO Zeo DEST (644-1)	Lentiviral Destination vector, expression, CMV/TO promoter, Zeo
pLenti PGK Blast DEST (w524-1)	Lentiviral Destination vector, expression, PGK promoter, Blast
pLenti PGK Blast V5-LUC (w528-1)	Lentiviral V5-Luciferase expression vector, PGK promoter, Blast
pLenti PGK GFP Blast (w510-5)	Lentiviral eGFP expression vector, PGK promoter, Blast
pLenti PGK GFP Puro (w509-5)	Lentiviral eGFP expression vector, PGK promoter, Puro
pLenti PGK Hygro DEST (w530-1)	Lentiviral Destination vector, expression, PGK promoter, Hygro
pLenti PGK Neo DEST (w531-1)	Lentiviral Destination vector, expression, PGK promoter, Neo
pLenti PGK Puro DEST (w529-2)	Lentiviral Destination vector, expression, PGK promoter, Puro
pLenti PGK V5-LUC Neo (w623-2)	Lentiviral V5-Luciferase expression vector, PGK promoter, Neo
pLenti PGK V5-LUC Puro (w543-1)	Lentiviral V5-Luciferase expression vector, PGK promoter, Puro
pLenti CMV TetR Blast (716-1)	Lentiviral Tetracycline repressor expression vector, CMV promoter, Blast
pLenti X1 GFP-Zeo DEST (720-2)	Lentiviral promoter-less Destination vector, GFP-Zeo
pLenti X1 Puro DEST (694-6)	Lentiviral promoter-less Destination vector, Puro
pLenti X1 Puro Empty (w610-1)	Lentiviral empty control vector, Puro
pLenti X1 Zeo DEST (668-1)	Lentiviral promoter-less Destination vector, Zeo
pLenti X2 Blast DEST (w46-2)	Lentiviral Destination vector, RNAi, 3’LTR insertion, Blast
pLenti X2 Blast/pTER shLUC (w618-1)	Lentiviral Luciferase shRNA (H1/TO promoter), 3’LTR insertion, Blast
pLenti X2 Hygro DEST (w17-1)	Lentiviral Destination vector, RNAi, 3’LTR insertion, Hygro
pLenti X2 Hygro/pTER shLUC (w607-1)	Lentiviral Luciferase shRNA (H1/TO promoter), 3’LTR insertion, Hygro
pLenti X2 Neo DEST (w18-1)	Lentiviral Destination vector, RNAi, 3’LTR insertion, Neo
pLenti X2 Neo empty (w36-1)	Lentiviral RNAi empty control vector, 3’LTR insertion, Neo
pLenti X2 Neo/pTER shEGFP#1 (w21-2)	Lentiviral eGFP shRNA #1 (H1/TO promoter), 3’LTR insertion, Neo
pLenti X2 Neo/pTER shEGFP#2 (w22-2)	Lentiviral eGFP shRNA #2 (H1/TO promoter), 3’LTR insertion, Neo
pLenti X2 Neo/pTER shLUC (w181-1)	Lentiviral Luciferase shRNA (H1/TO promoter), 3’LTR insertion, Neo
pLenti X2 Puro DEST (w16-1)	Lentiviral Destination vector, RNAi, 3’LTR insertion, Puro
pLenti X2 Puro empty (609-1)	Lentiviral RNAi empty control vector, 3’LTR insertion, Puro
pLenti X2 Puro/pTER shLUC (w589-1)	Lentiviral Luciferase shRNA (H1/TO promoter), 3’LTR insertion, Puro
pLenti X2 Zeo DEST (749-3)	Lentiviral Destination vector, RNAi, 3'LTR insertion, Zeo
pLenti X2 Zeo/pTER shLUC (w648-1)	Lentiviral Luciferase shRNA (H1/TO promoter), 3’LTR insertion, Zeo
pQCXIB CMV/TO DEST (w320-1)	Retroviral Destination vector, Expression, CMV/TO promoter, Blast
pQCXIB CMV/TO LUC (w431-1)	Retroviral Luciferase Expression vector, CMV/TO promoter, Blast
pQCXIB empty (w335-1)	Retroviral Empty control vector, CMV/TO promoter, Blast
pQCXIH CMV/TO DEST (w382-1)	Retroviral Destination vector, Expression, CMV/TO promoter, Hygro
pQCXIN CMV/TO DEST (w383-1)	Retroviral Destination vector, Expression, CMV/TO promoter, Neo
pQCXIN X2 DEST (w310-1)	Retroviral Destination vector, RNAi, 3’LTR insertion, Neo
pQCXIN X2/pSM2(CMV/TO) empty (w334-1)	Retroviral Empty control vector, miRNA (CMV/TO), 3’LTR insertion, Neo
pQCXIN X2/pTER shEGFP#2 (w491-1)	Retroviral eGFP shRNA #2 (H1/TO promoter), 3’LTR insertion, Neo
pQCXIN X2/pTER shLUC (w347-1)	Retroviral Luciferase shRNA (H1/TO promoter), 3’LTR insertion, Neo
pQCXIP X2 DEST (w270-1)	Retroviral Destination vector, RNAi, 3’LTR insertion, Puro
pQCXIP X2/pTER shLUC (w454-1)	Retroviral Luciferase shRNA (H1/TO promoter), 3’LTR insertion, Puro
pQCXIZ CMV/TO DEST (w321-2)	Retroviral Destination vector, Expression, CMV/TO promoter, Zeo
pQCXP CMV/TO DEST (w360-1)	Retroviral Destination vector, Expression, CMV/TO promoter, Puro
pQCXP CMV/TO empty (w368-1)	Retroviral Empty control vector, CMV/TO promoter, Puro
pQCXP CMV/TO LUC (w432-1)	Retroviral Luciferase expression vector, CMV/TO promoter, Puro
pQCXP CMV/TO V5-LUC (w476-1)	Retroviral V5-Luciferase expression vector, CMV/TO promoter, Puro
